# Supplementary material for: RAPID-ADPKD (Retrospective epidemiological study of Asia-Pacific patients with rapId Disease progression of Autosomal Dominant Polycystic Kidney Disease): study protocol for a multinational, retrospective cohort study
Source: PubMed Central journal article supplement — BMJ Open. 2020 Feb 6;10(2):e034103. doi: 10.1136/bmjopen-2019-034103 (PMC7045131; doi:10.1136/bmjopen-2019-034103), 2020-02-06
Supplement: bmjopen-2019-034103.draft_revisions.pdf [file bmjopen-2019-034103.draft_revisions.pdf]

# BMJ Open

BMJ Open is committed to open peer review. As part of this commitment we make the peer review history of every article we publish publicly available.

When an article is published we post the peer reviewers' comments and the authors' responses online. We also post the versions of the paper that were used during peer review. These are the versions that the peer review comments apply to.

The versions of the paper that follow are the versions that were submitted during the peer review process. They are not the versions of record or the final published versions. They should not be cited or distributed as the published version of this manuscript.

BMJ Open is an open access journal and the full, final, typeset and author-corrected version of record of the manuscript is available on our site with no access controls, subscription charges or pay-per-view fees (<http://bmjopen.bmj.com>).

If you have any questions on BMJ Open's open peer review process please email [info.bmjopen@bmj.com](mailto:info.bmjopen@bmj.com)

# BMJ Open

## **RAPID-ADPKD (Retrospective epidemiologic study of Asian-Pacific patients with rapId Disease progression of Autosomal Dominant Polycystic Kidney Disease): Study Protocol for a Multinational, Retrospective Cohort Study**

|                               |                                                                                                                                                                                                                                                                                                                                                                                                                                                                                                                                                                                                                                                                                                                                                                                                                                                                                                                                                                                                        |
|-------------------------------|--------------------------------------------------------------------------------------------------------------------------------------------------------------------------------------------------------------------------------------------------------------------------------------------------------------------------------------------------------------------------------------------------------------------------------------------------------------------------------------------------------------------------------------------------------------------------------------------------------------------------------------------------------------------------------------------------------------------------------------------------------------------------------------------------------------------------------------------------------------------------------------------------------------------------------------------------------------------------------------------------------|
| Journal:                      | <i>BMJ Open</i>                                                                                                                                                                                                                                                                                                                                                                                                                                                                                                                                                                                                                                                                                                                                                                                                                                                                                                                                                                                        |
| Manuscript ID                 | bmjopen-2019-034103                                                                                                                                                                                                                                                                                                                                                                                                                                                                                                                                                                                                                                                                                                                                                                                                                                                                                                                                                                                    |
| Article Type:                 | Protocol                                                                                                                                                                                                                                                                                                                                                                                                                                                                                                                                                                                                                                                                                                                                                                                                                                                                                                                                                                                               |
| Date Submitted by the Author: | 05-Sep-2019                                                                                                                                                                                                                                                                                                                                                                                                                                                                                                                                                                                                                                                                                                                                                                                                                                                                                                                                                                                            |
| Complete List of Authors:     | Ryu, Hyunjin; Seoul National University Hospital, Department of Internal Medicine<br>Park, Hayne ; Kangnam Sacred Heart Hospital, Department of Internal Medicine<br>Oh, Yun Kyu; Seoul National University Seoul Metropolitan Government Boramae Medical Center, Internal Medicine<br>Sangadi, Irene; Westmead Hospital, Department of Renal Medicine<br>Wong, Annette; Westmead Hospital, Department of Renal Medicine<br>Mei, Changlin; Changzheng Hospital, Department of Nephrology, Kidney Institute<br>Ecder, Tevfik; Istanbul Bilim Universitesi, Department of Internal Medicine<br>WANG , Angela; University of Hong Kong, Department of Medicine<br>Kao, Tze-Wah; Fu Jen Catholic University Hospital, Department of Internal Medicine<br>Huang, Jenq-Wen; National Taiwan University Hospital, Division of Nephrology<br>Rangan, Gopala; The Westmead Institute for Medical Research, Centre for Transplant and Renal Research<br>Ahn, Curie; Seoul National University, internal medicine |
| Keywords:                     | Autosomal dominant polycystic kidney disease, rapid progression, Asia-Pacific region, estimated glomerular filtration rate, height adjusted total kidney volume                                                                                                                                                                                                                                                                                                                                                                                                                                                                                                                                                                                                                                                                                                                                                                                                                                        |
|                               |                                                                                                                                                                                                                                                                                                                                                                                                                                                                                                                                                                                                                                                                                                                                                                                                                                                                                                                                                                                                        |

SCHOLARONE™  
Manuscripts

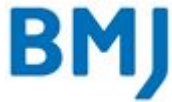

I, the Submitting Author has the right to grant and does grant on behalf of all authors of the Work (as defined in the below author licence), an exclusive licence and/or a non-exclusive licence for contributions from authors who are: i) UK Crown employees; ii) where BMJ has agreed a CC-BY licence shall apply, and/or iii) in accordance with the terms applicable for US Federal Government officers or employees acting as part of their official duties; on a worldwide, perpetual, irrevocable, royalty-free basis to BMJ Publishing Group Ltd ("BMJ") its licensees and where the relevant Journal is co-owned by BMJ to the co-owners of the Journal, to publish the Work in this journal and any other BMJ products and to exploit all rights, as set out in our [licence](#).

The Submitting Author accepts and understands that any supply made under these terms is made by BMJ to the Submitting Author unless you are acting as an employee on behalf of your employer or a postgraduate student of an affiliated institution which is paying any applicable article publishing charge ("APC") for Open Access articles. Where the Submitting Author wishes to make the Work available on an Open Access basis (and intends to pay the relevant APC), the terms of reuse of such Open Access shall be governed by a Creative Commons licence – details of these licences and which [Creative Commons](#) licence will apply to this Work are set out in our licence referred to above.

Other than as permitted in any relevant BMJ Author's Self Archiving Policies, I confirm this Work has not been accepted for publication elsewhere, is not being considered for publication elsewhere and does not duplicate material already published. I confirm all authors consent to publication of this Work and authorise the granting of this licence.

1  
2  
3  
4 **RAPID-ADPKD (Retrospective epidemiologic study of Asian-Pacific patients with rapid**  
5 **Disease progression of Autosomal Dominant Polycystic Kidney Disease): Study Protocol**  
6 **for a Multinational, Retrospective Cohort Study**  
7  
8  
9

10  
11 Hyunjin Ryu<sup>1</sup>, Hayne C. Park<sup>2</sup>, Yun Kyu Oh<sup>3</sup>, Irene Sangadi<sup>4</sup>, Annette Wong<sup>4</sup>, Changlin Mei<sup>5</sup>,  
12  
13 Tevfik Ecdar<sup>6</sup>, Angela Wang<sup>7</sup>, Tze-Wah Kao<sup>8</sup>, Jenq-Wen Huang<sup>9</sup>, Gopala Rangan<sup>4</sup>, and Curie  
14  
15 Ahn<sup>1</sup>, representing RAPID-ADPKD Study Group  
16  
17

18  
19 1. Department of Internal Medicine, Seoul National University Hospital, Seoul, Korea (the  
20  
21 Republic of).  
22

23  
24 2. Department of Internal Medicine, Kangnam Sacred Heart Hospital, Seoul, Korea (the  
25  
26 Republic of).  
27

28  
29 3. Department of Internal Medicine, Boramae Medical Center, Seoul, Korea (the Republic of).  
30

31  
32 4. Department of Renal Medicine, Westmead Hospital, Western Sydney Local Health District;  
33  
34 and Centre for Transplant and Renal Research, Westmead Institute for Medical Research, The  
35  
36 University of Sydney, Westmead, NSW 2145, Australia.  
37  
38

39  
40 5. Department of Nephrology, Kidney Institute, Changzheng Hospital, Second Military  
41  
42 Medical University, Shanghai, China.  
43

44  
45 6. Department of Internal Medicine, Division of Nephrology, Faculty of Medicine, Istanbul  
46  
47 Bilim University, Istanbul, Turkey  
48

49  
50 7. Department of Internal Medicine, Queen Mary Hospital, University of Hong Kong, Pok Fu  
51  
52 Lam, Hong Kong.  
53

54  
55 8. Division of Nephrology, Department of Internal Medicine, Fu Jen Catholic University  
56  
57  
58

1  
2  
3  
4 Hospital, Taipei, Taiwan.  
5

6  
7 9. Division of Nephrology, Department of Internal Medicine, National Taiwan University  
8  
9 Hospital and National Taiwan University College of Medicine, Taipei, Taiwan.  
10  
11

12  
13  
14  
15 Hyunjin Ryu, Department of Internal Medicine, Seoul National University Hospital, 101,  
16  
17 Daehak-ro Jongno-gu, Seoul 03080, Republic of Korea; e-mail: hdotopia@naver.com  
18  
19

20  
21 Hayne C. Park, Department of Internal Medicine, Kangnam Sacred Heart Hospital, 1, Singil-  
22  
23 ro, Yeongdeungpo-gu, Seoul, 07441, Republic of Korea; e-mail: haynepark798@gmail.com  
24  
25

26  
27 Yun Kyu Oh, Department of Internal Medicine, Boramae Medical Center, 20, Boramae-ro 5-  
28  
29 gil, Dongjak-gu, Seoul 07061, Republic of Korea; e-mail: yoonkyuoh@gmail.com  
30

31  
32 Irene Sangadi, Westmead Hospital, Western Sydney Local Health District and Centre for  
33  
34 Transplant and Renal Research, Westmead Institute for Medical Research, The University of  
35  
36 Sydney, Westmead, Cnr Hawkesbury Road, and Darcy Road Westmead NSW 2145, Australia;  
37  
38 e-mail: irene.sangadi@sydney.edu.au  
39

40  
41 Annette Wong, Westmead Hospital, Western Sydney Local Health District and Centre for  
42  
43 Transplant and Renal Research, Westmead Institute for Medical Research, The University of  
44  
45 Sydney, Westmead, Cnr Hawkesbury Road, and Darcy Road Westmead NSW 2145, Australia;  
46  
47 e-mail: annette.wong@sydney.edu.au  
48  
49

50  
51 Changlin Mei, Department of Nephrology, Kidney Institute, Changzheng Hospital, Second  
52  
53 Military Medical University, No.127, Caoxi Rd, Xuhui District, Shanghai, China; e-mail:  
54  
55 chlmei1954@126.com  
56  
57

1  
2  
3  
4 Tevfik Ecdar, Department of Internal Medicine, Division of Nephrology, Faculty of Medicine,  
5  
6 Istanbul Bilim University, Esentepe, Büyükdere Cd. No:120 34394, Şişli/İstanbul, Turkey; e-  
7  
8 mail: tevfikecdar@yahoo.com  
9

10  
11 Angela Wang, Department of Internal Medicine, Queen Mary Hospital, University of Hong  
12  
13 Kong, 102 Pok Fu Lam Road, Hong Kong; e-mail: aymwang@hku.hk  
14  
15

16  
17 Tze-Wah Kao Division of Nephrology, Department of Internal Medicine, Fu Jen Catholic  
18  
19 University Hospital, No. 69, Guizi Road, Taishan District, New Taipei City, Taiwan; e-mail:  
20  
21 twkao2@ntuh.gov.tw  
22  
23

24  
25 Jenq-Wen Huang, Division of Nephrology, Department of Internal Medicine, National Taiwan  
26  
27 University Hospital and National Taiwan University College of Medicine, No.1, Changde St.,  
28  
29 Zhongzheng Dist., Taipei City 10048, Taiwan; e-mail: jenqwen@gmail.com  
30  
31

32  
33 Gopala Rangan, Department of Renal Medicine, Westmead Hospital, Western Sydney Local  
34  
35 Health District; and Centre for Transplant and Renal Research, Westmead Institute for Medical  
36  
37 Research, The University of Sydney, Westmead, Cnr Hawkesbury Road, and Darcy Road  
38  
39 Westmead NSW 2145, Australia; e-mail: g.rangan@sydney.edu.au  
40  
41

42  
43  
44  
45 **\* Corresponding Author:**  
46

47  
48 Curie Ahn, Department of Internal Medicine, Seoul National University College of Medicine,  
49  
50 Seoul, 110-744, Republic of Korea. Telephone number: +82-2-2072-2222; Fax number: +82-  
51  
52 2-763-6317; E-mail address: curie@snu.ac.kr  
53  
54  
55  
56  
57  
58  
59  
60

1  
2  
3  
4  
5  
6  
7  
8  
9  
10  
11  
12  
13  
14  
15  
16  
17  
18  
19  
20  
21  
22  
23  
24  
25  
26  
27  
28  
29  
30  
31  
32  
33  
34  
35  
36  
37  
38  
39  
40  
41  
42  
43  
44  
45  
46  
47  
48  
49  
50  
51  
52  
53  
54  
55  
56  
57  
58  
59  
60

Running title: Design and Methods of RAPID-ADPKD study

For peer review only

## Abstract

**Introduction:** Autosomal dominant polycystic kidney disease (ADPKD) patients reach end-stage renal disease (ESRD) in their fifth decade on average. For effective treatment and early intervention, identifying subgroups with rapid progression is important in ADPKD. However, there are no epidemiologic data regarding the clinical manifestations and disease progression of ADPKD patients from the Asia-pacific region.

**Methods and analysis:** RAPID-ADPKD (Retrospective epidemiologic study of Asian-Pacific patients with rapid Disease progression of Autosomal Dominant Polycystic Kidney Disease) is a multinational retrospective observational cohort study of ADPKD patients in the Asia-pacific area. This study was designed to identify the clinical characteristics of ADPKD patients with rapid progression. Six hospitals from six regions (Australia, China, Hong Kong, South Korea, Taipei, and Turkey) are participating in this study. Adult ADPKD diagnosed by the Unified ultrasound criteria and with estimated glomerular filtration rate (eGFR)  $\geq 45$  mL/min/1.73m<sup>2</sup> at baseline will be included. The cohort will include patients with more than two records of eGFR and at least 24 months follow up data. Demographic information, clinical characteristics, comorbidities, medications, eGFR, radiologic findings that can calculate height-adjusted total kidney volume (htTKV), ADPKD-related complications and the PRO-PKD score will be collected using an electrical case report form. Rapid progression will be defined based on the ERA-EDTA guideline. All other patients without any of the criteria are classified as slow progression. The clinical characteristics will be compared between patients with rapid progression and slow progression. Also, the incidence of complications, effects of race and water intake on the renal progression will be analyzed. The planned sample size of the cohort is 1,000 patients, and data from 600 patients have been collected by May 30<sup>th</sup>, 2019.



1  
2  
3  
4 **Ethics and dissemination:** This study was approved by the Institutional Review Boards at  
5  
6 Seoul National University Hospital, Istanbul Bilim University Hospital, National Taiwan  
7  
8 University Hospital, Westmead Hospital, and Shanghai ChangZheng Hospital and on a process  
9  
10 with Queen Mary Hospital. The result will be presented in the conferences and published as a  
11  
12 journal to represent the clinical characteristics, risk factors for disease progression, and patterns  
13  
14 of complications in Asian populations with ADPKD.  
15  
16  
17  
18  
19  
20  
21

### 22 **Strengths and limitations of this study**

23  
24  
25 The strength of this study is that this is the first collaboration study in the Asia-Pacific  
26  
27 region, which will include more than 1,000 patients to identify the clinical characteristics of  
28  
29 ADPKD patients with rapid progression.  
30  
31

32  
33 Our strengths include that thorough clinical information during  $\geq 2$  years of follow-up of  
34  
35 the enrolled patients will be collected, including clinical manifestations, laboratory results,  
36  
37 renal radiologic findings, PRO-PKD scores and genotype information, which would give the  
38  
39 information of the clinical characteristics of ADPKD patients in Asian-Pacific, such as the  
40  
41 incidence of renal and extra-renal complications, diagnostic and assessment pattern, and the  
42  
43 effects of race and water intake on the progression.  
44  
45

46  
47 The limitation of the study is that due to the nature of retrospective observational study, we  
48  
49 could not unify the serum creatinine and renal volumes measurement methods, but instead will  
50  
51 collect the values that have been measured in each center and used in the real clinical practice.  
52  
53  
54  
55  
56  
57  
58  
59  
60

1  
2  
3  
4 We anticipate more collaborating studies among Asia-Pacific countries will be derived  
5  
6 from our study, which can benefit the Asia-Pacific ADPKD population.  
7  
8  
9  
10  
11  
12  
13  
14  
15  
16  
17  
18  
19  
20  
21  
22  
23  
24  
25  
26  
27  
28  
29  
30  
31  
32  
33  
34  
35  
36  
37  
38  
39  
40  
41  
42  
43  
44  
45  
46  
47  
48  
49  
50  
51  
52  
53  
54  
55  
56  
57  
58  
59  
60

For peer review only

## Introductions

Autosomal dominant polycystic kidney disease (ADPKD) is the most common hereditary renal disease in all races.<sup>1</sup> About 50% of ADPKD patients progress to end-stage renal disease (ESRD) in their fifth decades, and ADPKD is currently the fourth main cause of ESRD.<sup>2</sup> In addition to renal progression, various renal and extra-renal symptoms and complications occur in ADPKD patients during their life. ADPKD is a heterogeneous set of diseases caused by a mutation in either two genes, *PKD1* and *PKD2*. Patients with *PKD2* mutation show a milder clinical course compared to those with *PKD1* mutation.<sup>3</sup> However even in the same family, with the same germ-line mutation in *PKD1/PKD2* gene, manifestation and severity of disease differ from person to person.<sup>2</sup> These difference in disease manifestation and progression might be due to the influence of various environmental factors in addition to genetic factors.<sup>4</sup> Therefore, finding patients who will develop the severe disease is important in the clinical management of ADPKD. Moreover, since the approval of vasopressin V2 receptor antagonists by the US-FDA as the first medication to slow ADPKD progression, identifying the ‘rapid progressor’ has been a crucial step to decide who will benefit from the treatment.<sup>5</sup>

However, there have been only a few studies to characterize the disease nature and to analyze the progression of ADPKD in the Asian-Pacific population (**Table 1**). From the previous studies, a few unique characteristics of the Asian ADPKD population were noticed. About 50%-80% of genetic mutations in *PKD1* or *PKD 2* gene of Asian population were novel compared to previous genetic mutation database based on Western population.<sup>6-8</sup> In addition, differences in other genetic backgrounds, race, climates, culture, and lifestyle of Asian population can also affect the disease progression differently. Limited data suggest the possibility of faster renal progression in Asian chronic kidney disease (CKD) patients

1  
2  
3  
4 compared to the Western population.<sup>9-11</sup> However previous studies of Asian ADPKD  
5  
6 population were conducted in a single country which under-represented the whole Asian  
7  
8 ADPKD population.<sup>12-27</sup> Moreover, to date, the studies to identify the rapid progression  
9  
10 population of ADPKD patients were mostly conducted in the Western population.<sup>5, 28-30</sup>  
11  
12 Therefore, a larger number, multicenter study to find the clinical characteristics of Asian  
13  
14 ADPKD population and to define the risk factors for the rapid progression of the disease are  
15  
16 needed for Asian ADPKD patients.  
17  
18  
19  
20

21 Therefore, the aim of this multinational, multicenter, retrospective cohort study was to  
22  
23 determine the clinical characteristics of rapidly progressing ADPKD patients in the Asia-  
24  
25 Pacific region using the current recommendation for identification of rapid progression.<sup>5</sup> The  
26  
27 data of clinical characteristics, complications, and disease courses that represent ADPKD  
28  
29 patients in the Asia-Pacific region will also be collected. In addition, an exploratory goal of  
30  
31 this project is to determine whether there are racial differences in disease progression and the  
32  
33 incidence of cardiovascular complications in Asian ADPKD population, and thus contribute to  
34  
35 a baseline knowledge to inform future studies in this group of patients.  
36  
37  
38  
39  
40  
41  
42

## 43 **Methods and Analysis**

### 44 **Study design**

45  
46  
47 The RAPID-ADPKD (**R**etrospective epidemiologic study of **A**sian-**P**acific patients with **r**apid  
48  
49 **D**isease progression of **A**utosomal **D**ominant **P**olycystic **K**idney **D**isease) is a multinational  
50  
51 retrospective observational cohort study. This study was designed to determine the prevalence  
52  
53 of rapid progressor category of ADPKD patients in the Asia-pacific region based on the change  
54  
55  
56  
57  
58  
59  
60

of renal function, kidney size, and progression to ESRD.

## Organization

This study will enroll ADPKD patients who have visited one of six hospitals from six nations in the Asia-pacific area: ( i ) Australia: Westmead Hospital, Westmead; ( ii ) China: Changzheng Hospital of Shanghai; ( iii ) Hong Kong: Queen Mary Hospital of Hong Kong; ( iv ) South Korea: Seoul National University Hospital of South Korea; ( v ) Taiwan: National Taiwan University hospital of Taipei; and ( vi ) Turkey: Istanbul Bilim University of Turkey.

## Study population

After retrospectively reviewing the patients' data from each hospital, we will enroll patients  $\geq 18$  years old ( $\geq 19$  years old for Taiwan patients due to different age criteria for the adults) adult ADPKD patients with estimated glomerular filtration rate (eGFR)  $\geq 45$  mL/min/1.73m<sup>2</sup> at the index date of the study. The index date is the first available date of reviewed medical records between January 2010 and the enrollment period. The enrolled patients are diagnosed ADPKD patients based on Unified ultrasound criteria for the patients with ADPKD family history<sup>31</sup>: at least two (unilateral or bilateral) renal cysts in age of 18-29, at least two cysts in each kidney in age of 30-59 year old and more than 4 bilateral renal cysts in age  $\geq 60$  year old. For the patients without a family history of ADPKD, the clinical diagnosis of ADPKD based on typical radiologic findings and/or clinical evaluation will be also accepted. The patients should have at least two clinical visits with eGFR measurements between January 1<sup>st</sup>, 2010 and the time at enrollment. In addition, at the time of enrollment, patients should have followed the center during the last 24 months. Patients should also have at least two-year clinical records of follow-ups from the index date. **(Figure 1)**. Patients with severe heart failure, severe liver disease,

1  
2  
3  
4 chronic inflammatory disease and/or other comorbidities that can affect renal function will be  
5  
6 excluded. Active cancer patients who underwent chemotherapy during the observation period  
7  
8 will be excluded from the study. Any medical or surgical conditions that can affect renal  
9  
10 function or kidney volume will be excluded as well. The expected sample size of this  
11  
12 multinational retrospective observational cohort is more than 1,000 patients.  
13  
14  
15

### 16 **Data collection**

17  
18  
19 Demographic information at index dates such as gender, date of birth, race, height, and body  
20  
21 weight will be collected. Comorbid conditions including diabetes mellitus, dyslipidemia,  
22  
23 hypertension, valvular heart disease, pericardial effusion or left ventricular hypertrophy based  
24  
25 on echocardiography, chronic pulmonary disease, coronary artery disease, cerebrovascular  
26  
27 disease, and cancer will be investigated. In addition, blood pressure, smoking history and CKD  
28  
29 stage based on CKD-EPI eGFR at index date calculated using the formula of  
30  
31  $eGFR = 141 \times \min(\text{Scr} \times 0.0113/k, 1)^\alpha \times \max(\text{Scr} \times 0.0113/k, 1)^{-1.209} \times 0.993^{\text{Age}} \times 1.018$  [if  
32  
33 female]  $\times 1.159$  [if black], where Scr is serum creatinine, k is 0.7 for females and 0.9 for  
34  
35 males,  $\alpha$  is -0.329 for females and -0.411 for males, min indicates the minimum of Scr/k or 1,  
36  
37 and max indicates the maximum of Scr/k or 1,<sup>32</sup> family history of ESRD, medications (anti-  
38  
39 hypertensive agents including calcium channel blocker, angiotensin converting enzyme,  
40  
41 angiotensin receptor blocker and beta blocker, uric acid lowering agent, anti-diabetic agents  
42  
43 including metformin, DPP4 inhibitor and SGLT2 inhibitor, lipid lowering agents including  
44  
45 statins and others) and laboratory results (serum albumin, total bilirubin, cholesterol, high  
46  
47 density lipid, low density lipid, triglyceride, ALT, AST, sodium, potassium, chloride, blood  
48  
49 urea nitrogen, glucose and uric acid) will be gathered. At the index date and during the follow  
50  
51 up visits, serum creatinine, urine protein/creatinine ratio, height-adjusted total kidney volume  
52  
53  
54  
55  
56  
57  
58  
59  
60

1  
2  
3  
4 (htTKV) from radiologic findings of MRI, CT or ultrasound sonography, renal and extra-renal  
5  
6 ADPKD-related complications (cyst infection, events or image diagnosed hemorrhagic cysts,  
7  
8 proteinuria, kidney stone, gross hematuria, microscopic hematuria, chronic pain, upper urinary  
9  
10 tract infection, hypertension, hyperuricemia, hernia, liver cysts, intracranial aneurysms,  
11  
12 subarachnoid hemorrhage, abdominal aorta aneurysms, and infertility) and procedure  
13  
14 (nephrectomy, sclerotherapy, embolization, renal replacement therapy, hepatectomy, liver  
15  
16 transplantation, embolization, fenestration and intervention for intracranial aneurysm) will be  
17  
18 investigated.  
19  
20  
21  
22

23  
24 From the reviewed data, the PRO-PKD score and event information including ESRD, major  
25  
26 cardiovascular events (myocardial infarction, hospitalization for unstable angina, transient  
27  
28 ischemic attack and stroke, heart failure requiring hospitalization and peripheral artery  
29  
30 revascularization procedure), and death will be collected using an electronic case report form.  
31  
32 PRO-PKD score will be calculated based on the followings: score 1 for male, score 2 for  
33  
34 hypertension before 35 years of age, score 2 for having first urologic event such as macroscopic  
35  
36 hematuria, flank pain or cyst infection before 35 years of age, score 2 for non-truncating *PKDI*  
37  
38 mutation and score 4 for truncating *PKDI* mutation based on genetic testing results.<sup>28</sup> (**Figure**  
39  
40  
41 **1**)  
42  
43  
44

#### 45 **Serum creatinine measurement and eGFR calculation**

46  
47 To define the patients with rapid progression, standardizing creatinine measurement is  
48  
49 important. However, this is a multi-national retrospective study, and serum creatinine  
50  
51 measuring methods are inevitably different from centers and dates. To reduce the error in the  
52  
53 interpretation of eGFR caused by various creatinine measurement methods, in addition to  
54  
55 collecting serum creatinine value itself, we will also collect the creatinine measurement  
56  
57  
58  
59  
60

1  
2  
3  
4 methods such as Jaffe methods (calibrated with isotopic dilution mass spectrometry),  
5 enzymatic methods, alkaline picrate kinetic, alkaline picrate rate-blanked with compensation  
6 and alkaline picrate rate-blanked without compensation for the supporting information during  
7 the analysis. In the eGFR calculation, if the creatinine measurement was not calibrated with  
8 isotopic dilution mass spectrometry, eGFR will be calculated using the 5% reduced value of  
9 the recorded serum creatinine.<sup>33</sup> All eGFR will be calculated based on the CKD-EPI equation.<sup>32</sup>  
10  
11  
12  
13  
14  
15  
16  
17

### 18 **Total kidney volume calculation**

19  
20  
21 In order to collect the maximal amount of the htTKV data, we will gather information about  
22 the renal images from MRI, CT, or ultrasound undertaken during the follow-ups. The imaging  
23 dates and methods will be collected. If the htTKV was already measured using the images, the  
24 value and the measurement methods of total kidney volume (TKV) (ellipsoid, stereological  
25 measurement or other) will be collected. If there is no measurement done previously, the  
26 htTKV will be calculated using the ellipsoid methods.<sup>34</sup> For the analysis, htTKV calculated by  
27 ellipsoid methods would be used mainly to define the rapid progression. However, if other  
28 htTKV calculating methods such as stereological or planimetry are used in the same patient,  
29 the progression will be determined using the values also. In both cross-section and longitudinal  
30 analysis, the htTKV data will be analyzed and represented according to TKV measurement  
31 methods as both separately and all-together.  
32  
33  
34  
35  
36  
37  
38  
39  
40  
41  
42  
43  
44  
45  
46  
47

### 48 **Follow-up**

49  
50 Follow-up duration will be defined from the index date until the enrolled date. Date of events  
51 such as ESRD, major cardiovascular events, and death during the follow-up will be collected  
52 and used for the analysis. (Figure 1)  
53  
54  
55  
56  
57

### 58 **Outcome variables**



1  
2  
3  
4 The cohort will include patients with more than two records of eGFR and,  $\geq 24$  months of follow  
5  
6 up. The primary outcome of the study is to find out the clinical characteristics of the rapid  
7  
8 progressor among the Asia-Pacific ADPKD population. Rapid progression will be defined as  
9  
10 when any of following criteria are met, based on ERA-EDTA recommendations<sup>5</sup>: (i) an annual  
11  
12 eGFR decline  $\geq 5$  mL/min/1.73m<sup>2</sup> within 1 year and/or  $\geq 2.5$  mL/min/1.73m<sup>2</sup> per year over a  
13  
14 period of 5 years; (ii) an increase in htTKV  $\geq 5\%$  per year measured from  $\geq 3$  radiologic images;  
15  
16 (iii) Mayo classification 1C, 1D, or 1E or kidney length from ultrasonography of  $>16.5$  cm;  
17  
18 (iv) *PKDI* truncated mutation with early symptoms (PRO-PKD score  $> 6$ ). The remainder of  
19  
20 the patients will be classified as slow progressors. The clinical characteristics will be compared  
21  
22 between patients with rapid progression and slow progression. The secondary outcome of the  
23  
24 study is to determine the difference in complication rate, age of complication presentation and  
25  
26 treatment aspects between patients with rapid and slow progression. In addition, the subgroup  
27  
28 analysis according to age groups will be included in secondary outcome measures.  
29  
30  
31  
32  
33  
34

### 35 **Data collection, monitoring, and management**

36  
37 Whole data collection and monitoring will be managed by Contract Research Organization  
38  
39 (CRO). The person who enters data at each center will be educated by the clinical research  
40  
41 associate (CRA) before enrollment of the first patients from each center for the unity of the  
42  
43 data and to minimize the data input errors. Depending on the inclusion and exclusion criteria,  
44  
45 patients' eligibility for the study and final inclusion will be decided by the clinician at each  
46  
47 center. All the retrospective data will be collected using an electronic case report form (eCRF).  
48  
49 During the data collection, the CRA will visit the center during the input time period and keep  
50  
51 communicating with the person at centers to discover the data input errors earlier and handle  
52  
53 the possible upcoming issues. When the data are entered, internal monitoring will be conducted  
54  
55  
56  
57  
58  
59  
60

1  
2  
3  
4 at each center. After the data are entered from all centers, external monitoring will be performed  
5  
6 by the CRO. The missing data of the continuous variable will be categorized as the ‘missing’  
7  
8 category. Currently, the data from 600 patients have been collected by May 30<sup>th</sup>, 2019.  
9  
10

## 11 **Statistical methods**

12  
13  
14 After all the data are entered and monitored, the statistical analysis will be conducted with both  
15  
16 the total population and national levels. If a certain variable is not able to be collected at a  
17  
18 specific center, the analysis of the variable will be done after excluding the missing values. The  
19  
20 analysis will be done under the guideline of the International Committee on Harmonisation E9:  
21  
22 Statistical principles for clinical trials.<sup>35</sup>  
23  
24

25  
26 For the primary analysis, all the clinical variables will be analyzed according to two  
27  
28 categories: the rapid progressor and the slow progressor. Additional analysis will be conducted  
29  
30 according to CKD stages and age groups ( $\leq 30$  years old, 31 to 40 years old, 41 to 50 years old  
31  
32 and  $\geq 51$  years old), countries, and races. For the statistical analysis of the categorical variables,  
33  
34 Chi-square test will be used. With the continuous variables, Student’s t-test and Analysis of  
35  
36 Variance will be conducted. For the comparison of changes of eGFR and htTKV, the  
37  
38 generalized linear mixed model will be used to adjust the baseline difference between the  
39  
40 individuals. The event data will be analyzed using Cox-proportional hazard model. The value  
41  
42 of  $P < 0.05$  will be interpreted as statistically significant. For multiple comparisons, the Holm-  
43  
44 Bonferroni method will be used.  
45  
46  
47  
48

## 49 **Clinical significance of the study**

50  
51  
52 This RAPID-ADPKD study has been designed to represent the clinical data profile of the  
53  
54 ADPKD population in the Asia-Pacific region. In this study, ADPKD patients from six  
55  
56 different countries in Asia-Pacific region, Australia, China, Hong Kong, South Korea, Taiwan,  
57  
58  
59

1  
2  
3  
4 and Turkey, will be included and will have heterogeneity ADPKD population consisted of  
5  
6 different races such as Han Chinese, Korean, Turks, Kurds, Taiwanese aborigines, Caucasians,  
7  
8 etc. By using the data from ADPKD patients in six Asia-Pacific countries, we aim to identify  
9  
10 the risk factors for the rapid disease progression of Asian-Pacific ADPKD patients. To address  
11  
12 the renal progression of the study population, htTKV and eGFR of enrolled patients' will be  
13  
14 retrospectively reviewed and collected.  
15  
16

17  
18 We also expect to analyze the current status of Asian-Pacific ADPKD patients, such as the  
19  
20 pattern of extra-renal complication, diagnosis, treatment, and medical resource utilization in  
21  
22 Asian-Pacific ADPKD patients. Patients with ADPKD are known to have a higher risk of  
23  
24 hypertension and cardiovascular events compared to the general population.<sup>36-38</sup> However, in  
25  
26 the CKD population, there have been studies that reported that hypertension is better controlled  
27  
28 and the incidence of cardiovascular events is lower in Asian population compared to the  
29  
30 Western CKD population.<sup>39-41</sup> Whether the incidence of hypertension and cardiovascular event  
31  
32 are relatively low in Asian ADPKD patients compared to the Western population as in other  
33  
34 CKD patients are unknown. In addition, the Asian population has relatively smaller body mass  
35  
36 compared to the western population, and there might be a higher incidence of complications  
37  
38 due to severe polycystic liver disease and organomegaly in Asian ADPKD patients. Using the  
39  
40 retrospective data from RAPID-ADPKD study, we are planning to analyze the incidence of  
41  
42 extra-renal complications and seek the meaning in the Asian ADPKD population. Also the  
43  
44 medical resource utilization is influenced by the medical system and the government  
45  
46 reimbursement system. Therefore, the diagnostic pattern and assessment method of disease  
47  
48 progression during the follow-up would be different in Asian-Pacific ADPKD countries  
49  
50 compared to Western countries. For example, MRI is a gold standard tool for total kidney  
51  
52 volume measurement, but it is not reimbursed by the medical system in most Asian-Pacific  
53  
54  
55  
56  
57  
58  
59  
60

1  
2  
3  
4 countries and ultrasonography, or computed tomography is preferred in the clinical setting of  
5  
6 Asia Pacific regions. Results from the current study would give us much information about  
7  
8 current assessment protocol in Asian ADPKD population, which would be valuable data in  
9  
10 planning for future clinical studies in Asian ADPKD patients.  
11  
12  
13

14 In this study, the ethnical data will also be collected for the analysis of racial differences in  
15  
16 Asian ADPKD population. Only a couple of studies evaluated ADPKD progression in racial  
17  
18 differences. Freedman et al., reported that African American ADPKD patients showed faster  
19  
20 renal progression compared to Caucasian ADPKD patients in the United States.<sup>42, 43</sup> In the  
21  
22 respect of Asian population, Muto et al. reported from the Japanese subset study of TEMPO  
23  
24 4:3, the response to Tolvaptan on the annual rate of TKV growth was different in Japanese  
25  
26 population compared to that of total population.<sup>20</sup> Further studies regarding the racial difference  
27  
28 on the disease would give us an in-depth understanding of disease pathophysiology and the  
29  
30 identification of the rapid progressor. Therefore, the effect of race on the clinical manifestation  
31  
32 and renal progression that could be analyzed from RAPID-ADPKD study would be another  
33  
34 valuable finding.  
35  
36  
37  
38  
39

40 It is known that the serum level of antidiuretic hormone vasopressin is elevated at the status  
41  
42 of dehydration and this is related to cyst growths in ADPKD.<sup>44</sup> Based on this, sufficient water  
43  
44 intake, as well as vasopressin V2 receptor antagonist, has been applied to slow renal  
45  
46 progression in ADPKD patients.<sup>4, 45</sup> Even though the beneficial effect of increased water intake  
47  
48 has been supported by animal studies, there are not enough human studies to support the  
49  
50 recommendation. Therefore, currently, a randomized controlled trial, PREVENT-ADPKD to  
51  
52 determine the effect of increased water intake in ADPKD is underway.<sup>45</sup> In this RAPID-  
53  
54 ADPKD study, by collecting and analyzing the data of specific gravity of spot urine as a marker  
55  
56  
57  
58  
59  
60

1  
2  
3  
4 of water intake in a relatively large number of patients, we expect to provide baseline data for  
5  
6 the effect of the water intake on ADPKD patients.  
7  
8

### 9 **Limitations**

10  
11  
12 Since this is a retrospective observational cohort study from six different countries, we expect  
13 several limitations will exist. As we mentioned earlier, eGFR and htTKV, the two major  
14 indicators of disease progression in ADPKD, cannot be measured or interpreted by a unified  
15 method. Additionally, follow-up intervals or htTKV measurements will be different among  
16 different participating countries. In addition, there might be an insufficient number of patients  
17 who could provide genetic data, which is a known important prognostic marker of renal  
18 progression in ADPKD. Nevertheless, we believe that our analysis using eGFR and htTKV  
19 would become valuable findings since we will collect data from actual clinical practice and a  
20 large number of patients across different nations. Even though there are some limitations due  
21 to the nature of multinational retrospective observational study, we expect our results will give  
22 us valuable knowledge about clinical characteristics and rapid progressor of Asian ADPKD  
23 patients and basic information of current practice in Asian ADPKD clinics.  
24  
25  
26  
27  
28  
29  
30  
31  
32  
33  
34  
35  
36  
37  
38  
39  
40  
41  
42  
43

### 44 **Ethics and dissemination**

45  
46 The basic protocol of the study was approved by most of participating center's Institutional  
47 Review Boards (IRB) (Seoul National University Hospital, Seoul No 1801-114-917; Istanbul  
48 Bilim University Hospital, Turkey No 19.12.2017/65-11; National Taiwan University Hospital,  
49 Taiwan, No 201801072RSA; Westmead Hospital, Australia No LNR/17/WMEAD/444;  
50 Shanghai ChangZheng Hospital, China, No 2018SL025) and on process with Queen Mary  
51 Hospital of Hong Kong. This study is a retrospective observational cohort study, and there are  
52  
53  
54  
55  
56  
57  
58  
59  
60

1  
2  
3  
4 no interventions to the study subjects. Therefore, this study presents no more than minimal risk  
5  
6 of harm to the study subjects, and all IRB approved the consent waiver. All the collected data  
7  
8 for the study will be handled according to non-disclosure agreement and privacy legislation.  
9  
10 The data will be stored for at least five years after the completion of the enrollment but can be  
11  
12 deleted according to each nations' privacy regulations. The result will be presented in the  
13  
14 conferences and published as a journal to represent the clinical characteristics, risk factors for  
15  
16 disease progression and patterns of complications in Asian populations with ADPKD.  
17  
18  
19  
20  
21  
22  
23

### 24 **Patient and Public Involvement**

25  
26  
27 In this study, patients or the public were not involved in the design, or conduct, or reporting,  
28  
29 or dissemination of our research.  
30  
31  
32  
33  
34

### 35 **List of abbreviations**

36  
37  
38 ADPKD Autosomal dominant polycystic kidney disease  
39

40  
41 CKD Chronic kidney disease  
42

43  
44 CRA Clinical research associate  
45

46  
47 CRO Contract research organization  
48

49  
50 eCRF Electronic case report form  
51

52  
53 eGFR Estimated glomerular filtration rate  
54

55  
56 ESRD End-stage renal disease  
57  
58  
59  
60

1  
2  
3  
4 htTKV Height adjusted total kidney volume  
5  
6

7 IRB Institutional Review Boards  
8  
9

10 RAPID-ADPKD Retrospective epidemiologic study of Asian-Pacific patients with rapId  
11  
12 Disease progression of Autosomal Dominant Polycystic Kidney Disease  
13  
14

15 TKV Total kidney volume  
16  
17

18  
19  
20  
21 **Acknowledgements**  
22

23  
24 None.  
25  
26  
27  
28  
29  
30  
31  
32  
33  
34  
35  
36  
37  
38  
39  
40  
41  
42  
43  
44  
45  
46  
47  
48  
49  
50  
51  
52  
53  
54  
55  
56  
57  
58  
59  
60

## References

- 1 Torres VE, Harris PC, Pirson Y. Autosomal dominant polycystic kidney disease. *Lancet* 2007;369(9569):1287-301.
- 2 Torres VE, Harris PC. Autosomal dominant polycystic kidney disease: the last 3 years. *Kidney Int* 2009;76(2):149-68.
- 3 Hwang YH, Conklin J, Chan W, et al. Refining Genotype-Phenotype Correlation in Autosomal Dominant Polycystic Kidney Disease. *J Am Soc Nephrol* 2016;27(6):1861-8.
- 4 Chapman AB, Devuyst O, Eckardt KU, et al. Autosomal-dominant polycystic kidney disease (ADPKD): executive summary from a Kidney Disease: Improving Global Outcomes (KDIGO) Controversies Conference. *Kidney Int* 2015;88(1):17-27.
- 5 Gansevoort RT, Arici M, Benzing T, et al. Recommendations for the use of tolvaptan in autosomal dominant polycystic kidney disease: a position statement on behalf of the ERA-EDTA Working Groups on Inherited Kidney Disorders and European Renal Best Practice. *Nephrol Dial Transplant* 2016;31(3):337-48.
- 6 Choi R, Park HC, Lee K, et al. Identification of novel PKD1 and PKD2 mutations in Korean patients with autosomal dominant polycystic kidney disease. *BMC Med Genet* 2014;15:129.
- 7 Xu D, Ma Y, Gu X, et al. Novel Mutations in the PKD1 and PKD2 Genes of Chinese Patients with Autosomal Dominant Polycystic Kidney Disease. *Kidney Blood Press Res* 2018;43(2):297-309.
- 8 Chang MY, Chen HM, Jenq CC, et al. Novel PKD1 and PKD2 mutations in Taiwanese patients with autosomal dominant polycystic kidney disease. *J Hum Genet* 2013;58(11):720-7.
- 9 Barbour SJ, Er L, Djurdjev O, Karim M, Levin A. Differences in progression of CKD



1  
2  
3  
4  
5 and mortality amongst Caucasian, Oriental Asian and South Asian CKD patients. *Nephrol Dial*  
6  
7 *Transplant* 2010;25(11):3663-72.

8  
9  
10 Mathur R, Dreyer G, Yaqoob MM, Hull SA. Ethnic differences in the progression of  
11  
12 chronic kidney disease and risk of death in a UK diabetic population: an observational cohort  
13  
14 study. *BMJ Open* 2018;8(3):e020145.

15  
16  
17 Barbour SJ, Cattran DC, Kim SJ, et al. Individuals of Pacific Asian origin with IgA  
18  
19 nephropathy have an increased risk of progression to end-stage renal disease. *Kidney Int*  
20  
21 2013;84(5):1017-24.

22  
23  
24 Ravine D, Walker RG, Gibson RN, et al. Phenotype and genotype heterogeneity in  
25  
26 autosomal dominant polycystic kidney disease. *Lancet* 1992;340(8831):1330-3.

27  
28  
29 Liu Y, Zhang H, Zhong H. Systemic manifestations of adult polycystic kidney disease:  
30  
31 an analysis of 205 cases. *Zhonghua Nei Ke Za Zhi* 1995;34(9):612-5.

32  
33  
34 Chen D, Ma Y, Wang X, et al. Clinical characteristics and disease predictors of a large  
35  
36 Chinese cohort of patients with autosomal dominant polycystic kidney disease. *PLoS One*  
37  
38 2014;9(3):e92232.

39  
40  
41 Jin M, Xie Y, Chen Z, et al. System analysis of gene mutations and clinical phenotype  
42  
43 in Chinese patients with autosomal-dominant polycystic kidney disease. *Sci Rep* 2016;6:35945.

44  
45  
46 Meng J, Xu Y, Li A, et al. Clinical Features of 167 Inpatients with Autosomal  
47  
48 Dominant Polycystic Kidney Disease at a Single Center in China. *Med Sci Monit.*  
49  
50 2018;24:6498-505.

51  
52  
53  
54  
55  
56  
57  
58  
59  
60  
17 Alsaedi AJ, Jamal H, Al-Windawi S. The prevalence of hypertension and  
nephrolithiasis in a sample of Iraqi patients with autosomal-dominant polycystic kidney disease.  
*Saudi J Kidney Dis Transpl* 2011;22(5):1044-5.

- 1  
2  
3  
4  
5 18 Higashihara E, Horie S, Muto S, Mochizuki T, Nishio S, Nutahara K. Renal disease  
6 progression in autosomal dominant polycystic kidney disease. *Clin Exp Nephrol*  
7 2012;16(4):622-8.  
8  
9  
10  
11  
12 19 Kurashige M, Hanaoka K, Imamura M, et al. A comprehensive search for mutations  
13 in the PKD1 and PKD2 in Japanese subjects with autosomal dominant polycystic kidney  
14 disease. *Clin Genet* 2015;87(3):266-72.  
15  
16  
17 20 Muto S, Kawano H, Higashihara E, et al. The effect of tolvaptan on autosomal  
18 dominant polycystic kidney disease patients: a subgroup analysis of the Japanese patient subset  
19 from TEMPO 3:4 trial. *Clin Exp Nephrol* 2015;19(5):867-77.  
20  
21  
22 21 Higashihara E, Yamamoto K, Kaname S, et al. Age- and height-adjusted total kidney  
23 volume growth rate in autosomal dominant polycystic kidney diseases. *Clin Exp Nephrol*  
24 2019;23(1):100-11.  
25  
26  
27 22 Rabbani MA, Ali SS, Murtaza G, et al. Clinical presentation and outcome of autosomal  
28 dominant polycystic kidney disease in Pakistan: a single center experience. *J Pak Med Assoc*  
29 2008;58(6):305-9.  
30  
31  
32 23 Kim H, Park HC, Ryu H, et al. Clinical Correlates of Mass Effect in Autosomal  
33 Dominant Polycystic Kidney Disease. *PLoS One* 2015;10(12):e0144526.  
34  
35  
36 24 Kim H, Koh J, Park SK, et al. Baseline Characteristics of the Autosomal Dominant  
37 Polycystic Kidney Disease Subcohort of the KoreaN Cohort Study for Outcomes in Patients  
38 With Chronic Kidney Disease (KNOW-CKD). *Nephrology (Carlton)* 2018.  
39  
40  
41 25 Sung PH, Chiang HJ, Yang YH, Chen CJ, Chiang JY, Yip HK. An association between  
42 autosomal-dominant polycystic kidney disease and the risk of acute myocardial infarction in  
43 Asian population - results of a nationwide study. *Oncotarget* 2017;8(12):19365-75.  
44  
45  
46  
47  
48  
49  
50  
51  
52  
53  
54  
55  
56  
57  
58  
59  
60

- 1  
2  
3  
4  
5 26 Kazancioglu R, Ecdar T, Altintepe L, et al. Demographic and clinical characteristics  
6 of patients with autosomal dominant polycystic kidney disease: a multicenter experience.  
7  
8  
9  
10 *Nephron Clin Pract* 2011;117(3):c270-5.  
11  
12 27 Ozkok A, Akpınar TS, Tufan F, et al. Clinical characteristics and predictors of  
13 progression of chronic kidney disease in autosomal dominant polycystic kidney disease: a  
14 single center experience. *Clin Exp Nephrol* 2013;17(3):345-51.  
15  
16  
17  
18 28 Cornec-Le Gall E, Audrezet MP, Rousseau A, et al. The PROPKD Score: A New  
19 Algorithm to Predict Renal Survival in Autosomal Dominant Polycystic Kidney Disease. *J Am*  
20  
21  
22  
23 *Soc Nephrol* 2016;27(3):942-51.  
24  
25  
26 29 Irazabal MV, Rangel LJ, Bergstralh EJ, et al. Imaging classification of autosomal  
27 dominant polycystic kidney disease: a simple model for selecting patients for clinical trials. *J*  
28  
29  
30  
31 *Am Soc Nephrol* 2015;26(1):160-72.  
32  
33 30 Schrier RW, Brosnahan G, Cadnapaphornchai MA, et al. Predictors of autosomal  
34 dominant polycystic kidney disease progression. *J Am Soc Nephrol* 2014;25(11):2399-418.  
35  
36  
37 31 Pei Y, Obaji J, Dupuis A, et al. Unified criteria for ultrasonographic diagnosis of  
38 ADPKD. *J Am Soc Nephrol* 2009;20(1):205-12.  
39  
40  
41  
42 32 Levey AS, Stevens LA, Schmid CH, et al. A new equation to estimate glomerular  
43 filtration rate. *Ann Intern Med* 2009;150(9):604-12.  
44  
45  
46  
47 33 Skali H, Uno H, Levey AS, Inker LA, Pfeffer MA, Solomon SD. Prognostic  
48 assessment of estimated glomerular filtration rate by the new Chronic Kidney Disease  
49 Epidemiology Collaboration equation in comparison with the Modification of Diet in Renal  
50 Disease Study equation. *Am Heart J* 2011;162(3):548-54.  
51  
52  
53  
54  
55 34 O'Neill WC, Robbin ML, Bae KT, et al. Sonographic assessment of the severity and  
56  
57  
58  
59  
60

1  
2  
3  
4  
5 progression of autosomal dominant polycystic kidney disease: the Consortium of Renal  
6 Imaging Studies in Polycystic Kidney Disease (CRISP). *Am J Kidney Dis* 2005;46(6):1058-64.

7  
8  
9  
10 35 Lewis JA. Statistical principles for clinical trials (ICH E9): an introductory note on an  
11 international guideline. *Stat Med* 1999;18(15):1903-42.

12  
13  
14 36 Helal I, Reed B, Mettler P, et al. Prevalence of cardiovascular events in patients with  
15 autosomal dominant polycystic kidney disease. *Am J Nephrol* 2012;36(4):362-70.

16  
17  
18 37 Massella L, Mekahli D, Paripovic D, et al. Prevalence of Hypertension in Children  
19 with Early-Stage ADPKD. *Clin J Am Soc Nephrol* 2018;13(6):874-83.

20  
21  
22 38 Fick GM, Johnson AM, Hammond WS, Gabow PA. Causes of death in autosomal  
23 dominant polycystic kidney disease. *J Am Soc Nephrol* 1995;5(12):2048-56.

24  
25  
26 39 Alencar de Pinho N, Levin A, Fukagawa M, et al. Considerable international variation  
27 exists in blood pressure control and antihypertensive prescription patterns in chronic kidney  
28 disease. *Kidney Int* 2019;

29  
30  
31 40 Tanaka K, Watanabe T, Takeuchi A, et al. Cardiovascular events and death in Japanese  
32 patients with chronic kidney disease. *Kidney Int* 2017;91(1):227-34.

33  
34  
35 41 Jolly SE, Burrows NR, Chen SC, et al. Racial and ethnic differences in mortality  
36 among individuals with chronic kidney disease: results from the Kidney Early Evaluation  
37 Program (KEEP). *Clin J Am Soc Nephrol* 2011;6(8):1858-65.

38  
39  
40 42 Freedman BI, Soucie JM, Chapman A, Krisher J, McClellan WM. Racial variation in  
41 autosomal dominant polycystic kidney disease. *Am J Kidney Dis* 2000;35(1):35-9.

42  
43  
44 43 Murphy EL, Dai F, Blount KL, et al. Revisiting racial differences in ESRD due to  
45 ADPKD in the United States. *BMC Nephrol* 2019;20(1):55.

46  
47  
48 44 Gattone VH, 2nd, Wang X, Harris PC, Torres VE. Inhibition of renal cystic disease

1  
2  
3  
4  
5 development and progression by a vasopressin V2 receptor antagonist. *Nat Med*  
6  
7 2003;9(10):1323-6.  
8

9  
10 45 Wong ATY, Mannix C, Grantham JJ, et al. Randomised controlled trial to determine  
11 the efficacy and safety of prescribed water intake to prevent kidney failure due to autosomal  
12 dominant polycystic kidney disease (PREVENT-ADPKD). *BMJ Open* 2018;8(1):e018794.  
13  
14  
15

### 16 17 18 19 20 **Authors' contribution**

21  
22  
23 HR participated in design of the work, data acquisition, data analysis and drafting the work,  
24 HCP and YKO participated in the design of the work, interpretation of data and revising the  
25 manuscript. IS, AW, CM, TE, AW, TWK and JWH have been worked in the design of the  
26 work, acquisition and monitoring the data for the improvement of the accuracy. GR participated  
27 in the design of the work, acquisition, interpretation of the data, revising the manuscript and  
28 final approval of the manuscript to be published. CA designed the study, gathered study  
29 collaborators and finalizing the manuscript. All authors read and approved the manuscript.  
30  
31  
32  
33  
34  
35  
36  
37  
38  
39  
40  
41  
42

### 43 **Funding Statement**

44  
45  
46 This work was supported by Korea Otsuka International Asia Arab Co., Ltd. This funding  
47 source had no role in the design of this study and will not have any role during its execution,  
48 analyses, interpretation of the data, or decision to submit results.  
49  
50  
51  
52  
53  
54  
55  
56

### 57 **Competing interests**

1  
2  
3  
4  
5 The study was supported by Korea Otsuka International Asia Arab Co., Ltd. and GR received  
6 grant support from Danone Nutricia research for clinical research into ADPKD  
7  
8  
9  
10  
11  
12

### 13 **License Statement**

14  
15  
16  
17 I, the Submitting Author has the right to grant and does grant on behalf of all authors of the  
18 Work (as defined in the below author licence), an exclusive licence and/or a non-exclusive  
19 licence for contributions from authors who are: i) UK Crown employees; ii) where BMJ has  
20 agreed a CC-BY licence shall apply, and/or iii) in accordance with the terms applicable for US  
21 Federal Government officers or employees acting as part of their official duties; on a worldwide,  
22 perpetual, irrevocable, royalty-free basis to BMJ Publishing Group Ltd (“BMJ”) its licensees  
23 and where the relevant Journal is co-owned by BMJ to the co-owners of the Journal, to publish  
24 the Work in BMJ Open and any other BMJ products and to exploit all rights, as set out in our  
25 licence.  
26  
27  
28  
29  
30  
31  
32  
33  
34  
35  
36  
37  
38  
39  
40  
41  
42  
43  
44  
45  
46  
47  
48  
49  
50

### 51 **Figure Legends**

52  
53  
54 **Figure 1. The planned structure and the data collections in RAPID-ADPKD study**  
55  
56  
57  
58  
59  
60

### 51 **Table Legends**

52  
53  
54 **Table 1. The summary of studies regarding clinical characteristic or renal progression in**  
55 **Asian ADPKD patients**  
56  
57  
58  
59  
60

| Country   | Subject of the journal                                                                   | Number of analyzed patients | Study type                       | Published year | Reference |
|-----------|------------------------------------------------------------------------------------------|-----------------------------|----------------------------------|----------------|-----------|
| Australia | Genotype-Phenotype correlation                                                           | 285                         | Cross-sectional study            | 1992           | 12        |
| China     | Clinical manifestation                                                                   | 205                         | Cross-sectional study            | 1995           | 13        |
| China     | Clinical characteristics and disease progression                                         | 541                         | Prospective cohort study         | 2014           | 14        |
| China     | Genotype-Phenotype correlation                                                           | 148                         | Cross-sectional study            | 2016           | 15        |
| China     | Clinical feature of inpatient ADPKD patients                                             | 168                         | Retrospective study              | 2018           | 16        |
| Iraq      | Clinical manifestation                                                                   | 30                          | Cross-sectional study            | 2011           | 17        |
| Japan     | Renal progression                                                                        | 255                         | Retrospective study              | 2012           | 18        |
| Japan     | Genotype and renal progression                                                           | 112                         | Retrospective study              | 2014           | 19        |
| Japan     | Renal progression and effect of Tolvaptan in Japanese patient subset from TEMPO3:4 trial | 177                         | Subgroup study of clinical trial | 2015           | 20        |
| Japan     | Clinical characteristics according to mayo classification                                | 296                         | Retrospective study              | 2019           | 21        |
| Pakistan  | Clinical presentation                                                                    | 56                          | Cross-sectional                  | 2008           | 22        |

|        |                                                                                                  |      |                            |       |    |  |
|--------|--------------------------------------------------------------------------------------------------|------|----------------------------|-------|----|--|
|        |                                                                                                  |      |                            | study |    |  |
| South  | Clinical characteristics                                                                         | 461  | Cross-sectional            | 2015  | 23 |  |
| Korea  |                                                                                                  |      | study                      |       |    |  |
| South  | Clinical characteristics                                                                         | 364  | Prospective                | 2018  | 24 |  |
| Korea  |                                                                                                  |      | cohort study               |       |    |  |
| Taipei | Incidence of cardiovascular complications<br>in ADPKD patients compared to general<br>population | 2062 | National<br>database study | 2017  | 25 |  |
| Turkey | Clinical characteristics                                                                         | 1139 | Cross-sectional<br>study   | 2011  | 26 |  |
| Turkey | Clinical characteristics and predictor of<br>renal progression                                   | 323  | Retrospective<br>study     | 2013  | 27 |  |



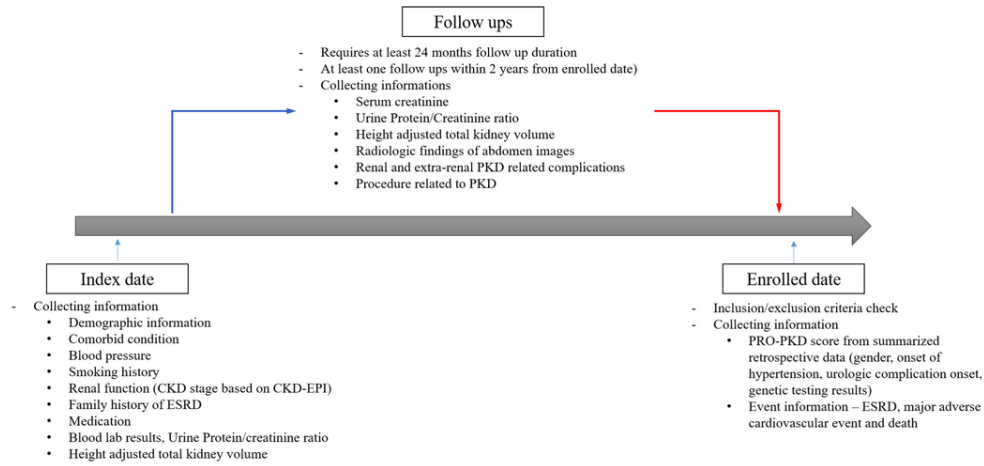

Figure 1. The planned structure and the data collections in RAPID-ADPKD study

90x41mm (300 x 300 DPI)

STROBE Statement—Checklist of items that should be included in reports of *cross-sectional studies*

|                              | Item No | Recommendation                                                                                                                                                                                    | Check list             |
|------------------------------|---------|---------------------------------------------------------------------------------------------------------------------------------------------------------------------------------------------------|------------------------|
| <b>Title and abstract</b>    | 1       | (a) Indicate the study's design with a commonly used term in the title or the abstract                                                                                                            | √<br>Page 1, 5         |
|                              |         | (b) Provide in the abstract an informative and balanced summary of what was done and what was found                                                                                               | √<br>Page 5            |
| <b>Introduction</b>          |         |                                                                                                                                                                                                   |                        |
| Background/rationale         | 2       | Explain the scientific background and rationale for the investigation being reported                                                                                                              | √<br>Page 8-9          |
| Objectives                   | 3       | State specific objectives, including any prespecified hypotheses                                                                                                                                  | √<br>Page 9            |
| <b>Methods</b>               |         |                                                                                                                                                                                                   |                        |
| Study design                 | 4       | Present key elements of study design early in the paper                                                                                                                                           | √<br>Page 9            |
| Setting                      | 5       | Describe the setting, locations, and relevant dates, including periods of recruitment, exposure, follow-up, and data collection                                                                   | √<br>Page 10, Figure 1 |
| Participants                 | 6       | (a) Give the eligibility criteria, and the sources and methods of selection of participants                                                                                                       | √<br>Page 10           |
| Variables                    | 7       | Clearly define all outcomes, exposures, predictors, potential confounders, and effect modifiers. Give diagnostic criteria, if applicable                                                          | √<br>Page 11           |
| Data sources/<br>measurement | 8*      | For each variable of interest, give sources of data and details of methods of assessment (measurement). Describe comparability of assessment methods if there is more than one group              | √<br>Page 11-13        |
| Bias                         | 9       | Describe any efforts to address potential sources of bias                                                                                                                                         | √<br>Page 11-13        |
| Study size                   | 10      | Explain how the study size was arrived at                                                                                                                                                         | √<br>Page 14           |
| Quantitative variables       | 11      | Explain how quantitative variables were handled in the analyses. If applicable, describe which groupings were chosen and why                                                                      | √<br>Page 15           |
| Statistical methods          | 12      | (a) Describe all statistical methods, including those used to control for confounding                                                                                                             | √<br>Page 15           |
|                              |         | (b) Describe any methods used to examine subgroups and interactions                                                                                                                               | √<br>Page 15           |
|                              |         | (c) Explain how missing data were addressed                                                                                                                                                       | √<br>Page 15           |
|                              |         | (d) If applicable, describe analytical methods taking account of sampling strategy                                                                                                                | √<br>Page 15           |
|                              |         | (e) Describe any sensitivity analyses                                                                                                                                                             | √<br><b>Page 14</b>    |
| <b>Results</b>               |         |                                                                                                                                                                                                   |                        |
| Participants                 | 13*     | (a) Report numbers of individuals at each stage of study—eg numbers potentially eligible, examined for eligibility, confirmed eligible, included in the study, completing follow-up, and analysed | NA                     |

|                          |     |                                                                                                                                                                                                              |                 |
|--------------------------|-----|--------------------------------------------------------------------------------------------------------------------------------------------------------------------------------------------------------------|-----------------|
|                          |     | (b) Give reasons for non-participation at each stage                                                                                                                                                         | NA              |
|                          |     | (c) Consider use of a flow diagram                                                                                                                                                                           | NA              |
| Descriptive data         | 14* | (a) Give characteristics of study participants (eg demographic, clinical, social) and information on exposures and potential confounders                                                                     | NA              |
|                          |     | (b) Indicate number of participants with missing data for each variable of interest                                                                                                                          | NA              |
| Outcome data             | 15* | Report numbers of outcome events or summary measures                                                                                                                                                         | NA              |
| Main results             | 16  | (a) Give unadjusted estimates and, if applicable, confounder-adjusted estimates and their precision (eg, 95% confidence interval). Make clear which confounders were adjusted for and why they were included | NA              |
|                          |     | (b) Report category boundaries when continuous variables were categorized                                                                                                                                    | NA              |
|                          |     | (c) If relevant, consider translating estimates of relative risk into absolute risk for a meaningful time period                                                                                             | NA              |
| Other analyses           | 17  | Report other analyses done—eg analyses of subgroups and interactions, and sensitivity analyses                                                                                                               | √<br>Page 15-16 |
| <b>Discussion</b>        |     |                                                                                                                                                                                                              |                 |
| Key results              | 18  | Summarise key results with reference to study objectives                                                                                                                                                     | √<br>Page 15-16 |
| Limitations              | 19  | Discuss limitations of the study, taking into account sources of potential bias or imprecision. Discuss both direction and magnitude of any potential bias                                                   | √<br>Page 18    |
| Interpretation           | 20  | Give a cautious overall interpretation of results considering objectives, limitations, multiplicity of analyses, results from similar studies, and other relevant evidence                                   | NA              |
| Generalisability         | 21  | Discuss the generalisability (external validity) of the study results                                                                                                                                        | √<br>Page 15    |
| <b>Other information</b> |     |                                                                                                                                                                                                              |                 |
| Funding                  | 22  | Give the source of funding and the role of the funders for the present study and, if applicable, for the original study on which the present article is based                                                | √<br>Page 26    |

\*Give information separately for exposed and unexposed groups.

**Note:** An Explanation and Elaboration article discusses each checklist item and gives methodological background and published examples of transparent reporting. The STROBE checklist is best used in conjunction with this article (freely available on the Web sites of PLoS Medicine at <http://www.plosmedicine.org/>, Annals of Internal Medicine at <http://www.annals.org/>, and Epidemiology at <http://www.epidem.com/>). Information on the STROBE Initiative is available at [www.strobe-statement.org](http://www.strobe-statement.org).

# BMJ Open

## RAPID-ADPKD (Retrospective epidemiologic study of Asian-Pacific patients with rapId Disease progression of Autosomal Dominant Polycystic Kidney Disease): Study Protocol for a Multinational, Retrospective Cohort Study

|                                 |                                                                                                                                                                                                                                                                                                                                                                                                                                                                                                                                                                                                                                                                                                                                                                                                                                                                                                                                                                                                        |
|---------------------------------|--------------------------------------------------------------------------------------------------------------------------------------------------------------------------------------------------------------------------------------------------------------------------------------------------------------------------------------------------------------------------------------------------------------------------------------------------------------------------------------------------------------------------------------------------------------------------------------------------------------------------------------------------------------------------------------------------------------------------------------------------------------------------------------------------------------------------------------------------------------------------------------------------------------------------------------------------------------------------------------------------------|
| Journal:                        | <i>BMJ Open</i>                                                                                                                                                                                                                                                                                                                                                                                                                                                                                                                                                                                                                                                                                                                                                                                                                                                                                                                                                                                        |
| Manuscript ID                   | bmjopen-2019-034103.R1                                                                                                                                                                                                                                                                                                                                                                                                                                                                                                                                                                                                                                                                                                                                                                                                                                                                                                                                                                                 |
| Article Type:                   | Protocol                                                                                                                                                                                                                                                                                                                                                                                                                                                                                                                                                                                                                                                                                                                                                                                                                                                                                                                                                                                               |
| Date Submitted by the Author:   | 09-Dec-2019                                                                                                                                                                                                                                                                                                                                                                                                                                                                                                                                                                                                                                                                                                                                                                                                                                                                                                                                                                                            |
| Complete List of Authors:       | Ryu, Hyunjin; Seoul National University Hospital, Department of Internal Medicine<br>Park, Hayne ; Kangnam Sacred Heart Hospital, Department of Internal Medicine<br>Oh, Yun Kyu; Seoul National University Seoul Metropolitan Government Boramae Medical Center, Internal Medicine<br>Sangadi, Irene; Westmead Hospital, Department of Renal Medicine<br>Wong, Annette; Westmead Hospital, Department of Renal Medicine<br>Mei, Changlin; Changzheng Hospital, Department of Nephrology, Kidney Institute<br>Ecder, Tevfik; Istanbul Bilim Universitesi, Department of Internal Medicine<br>WANG , Angela; University of Hong Kong, Department of Medicine<br>Kao, Tze-Wah; Fu Jen Catholic University Hospital, Department of Internal Medicine<br>Huang, Jenq-Wen; National Taiwan University Hospital, Division of Nephrology<br>Rangan, Gopala; The Westmead Institute for Medical Research, Centre for Transplant and Renal Research<br>Ahn, Curie; Seoul National University, internal medicine |
| <b>Primary Subject Heading</b>: | Renal medicine                                                                                                                                                                                                                                                                                                                                                                                                                                                                                                                                                                                                                                                                                                                                                                                                                                                                                                                                                                                         |
| Secondary Subject Heading:      | Epidemiology, Renal medicine, Global health                                                                                                                                                                                                                                                                                                                                                                                                                                                                                                                                                                                                                                                                                                                                                                                                                                                                                                                                                            |
| Keywords:                       | Autosomal dominant polycystic kidney disease, rapid progression, Asia-Pacific region, estimated glomerular filtration rate, height adjusted total kidney volume                                                                                                                                                                                                                                                                                                                                                                                                                                                                                                                                                                                                                                                                                                                                                                                                                                        |
|                                 |                                                                                                                                                                                                                                                                                                                                                                                                                                                                                                                                                                                                                                                                                                                                                                                                                                                                                                                                                                                                        |

SCHOLARONE™  
Manuscripts



I, the Submitting Author has the right to grant and does grant on behalf of all authors of the Work (as defined in the below author licence), an exclusive licence and/or a non-exclusive licence for contributions from authors who are: i) UK Crown employees; ii) where BMJ has agreed a CC-BY licence shall apply, and/or iii) in accordance with the terms applicable for US Federal Government officers or employees acting as part of their official duties; on a worldwide, perpetual, irrevocable, royalty-free basis to BMJ Publishing Group Ltd ("BMJ") its licensees and where the relevant Journal is co-owned by BMJ to the co-owners of the Journal, to publish the Work in this journal and any other BMJ products and to exploit all rights, as set out in our [licence](#).

The Submitting Author accepts and understands that any supply made under these terms is made by BMJ to the Submitting Author unless you are acting as an employee on behalf of your employer or a postgraduate student of an affiliated institution which is paying any applicable article publishing charge ("APC") for Open Access articles. Where the Submitting Author wishes to make the Work available on an Open Access basis (and intends to pay the relevant APC), the terms of reuse of such Open Access shall be governed by a Creative Commons licence – details of these licences and which [Creative Commons](#) licence will apply to this Work are set out in our licence referred to above.

Other than as permitted in any relevant BMJ Author's Self Archiving Policies, I confirm this Work has not been accepted for publication elsewhere, is not being considered for publication elsewhere and does not duplicate material already published. I confirm all authors consent to publication of this Work and authorise the granting of this licence.

1  
2  
3  
4 **RAPID-ADPKD (Retrospective epidemiologic study of Asian-Pacific patients with rapid**  
5 **Disease progression of Autosomal Dominant Polycystic Kidney Disease): Study Protocol**  
6 **for a Multinational, Retrospective Cohort Study**  
7  
8  
9

10  
11 Hyunjin Ryu<sup>1</sup>, Hayne C. Park<sup>2</sup>, Yun Kyu Oh<sup>3</sup>, Irene Sangadi<sup>4</sup>, Annette Wong<sup>4</sup>, Changlin Mei<sup>5</sup>,  
12  
13 Tevfik Ecdar<sup>6</sup>, Angela Wang<sup>7</sup>, Tze-Wah Kao<sup>8</sup>, Jenq-Wen Huang<sup>9</sup>, Gopala Rangan<sup>4</sup>, and Curie  
14  
15 Ahn<sup>1</sup>, representing RAPID-ADPKD Study Group  
16  
17

18  
19 1. Department of Internal Medicine, Seoul National University Hospital, Seoul, Korea (the  
20  
21 Republic of).  
22

23  
24 2. Department of Internal Medicine, Kangnam Sacred Heart Hospital, Seoul, Korea (the  
25  
26 Republic of).  
27

28  
29 3. Department of Internal Medicine, Boramae Medical Center, Seoul, Korea (the Republic of).  
30

31  
32 4. Department of Renal Medicine, Westmead Hospital, Western Sydney Local Health District;  
33  
34 and Centre for Transplant and Renal Research, Westmead Institute for Medical Research, The  
35  
36 University of Sydney, Westmead, NSW 2145, Australia.  
37  
38

39  
40 5. Department of Nephrology, Kidney Institute, Changzheng Hospital, Second Military  
41  
42 Medical University, Shanghai, China.  
43

44  
45 6. Department of Internal Medicine, Division of Nephrology, Faculty of Medicine, Istanbul  
46  
47 Bilim University, Istanbul, Turkey  
48

49  
50 7. Department of Internal Medicine, Queen Mary Hospital, University of Hong Kong, Pok Fu  
51  
52 Lam, Hong Kong.  
53

54  
55 8. Division of Nephrology, Department of Internal Medicine, Fu Jen Catholic University  
56  
57  
58

1  
2  
3  
4 Hospital, Taipei, Taiwan.  
5

6  
7 9. Division of Nephrology, Department of Internal Medicine, National Taiwan University  
8  
9 Hospital and National Taiwan University College of Medicine, Taipei, Taiwan.  
10

11  
12  
13  
14  
15 Hyunjin Ryu, Department of Internal Medicine, Seoul National University Hospital, 101,  
16  
17 Daehak-ro Jongno-gu, Seoul 03080, Republic of Korea; e-mail: hdotopia@naver.com  
18

19  
20  
21 Hayne C. Park, Department of Internal Medicine, Kangnam Sacred Heart Hospital, 1, Singil-  
22  
23 ro, Yeongdeungpo-gu, Seoul, 07441, Republic of Korea; e-mail: haynepark798@gmail.com  
24

25  
26 Yun Kyu Oh, Department of Internal Medicine, Boramae Medical Center, 20, Boramae-ro 5-  
27  
28 gil, Dongjak-gu, Seoul 07061, Republic of Korea; e-mail: yoonkyuoh@gmail.com  
29

30  
31 Irene Sangadi, Westmead Hospital, Western Sydney Local Health District and Centre for  
32  
33 Transplant and Renal Research, Westmead Institute for Medical Research, The University of  
34  
35 Sydney, Westmead, Cnr Hawkesbury Road, and Darcy Road Westmead NSW 2145, Australia;  
36  
37 e-mail: irene.sangadi@sydney.edu.au  
38

39  
40  
41 Annette Wong, Westmead Hospital, Western Sydney Local Health District and Centre for  
42  
43 Transplant and Renal Research, Westmead Institute for Medical Research, The University of  
44  
45 Sydney, Westmead, Cnr Hawkesbury Road, and Darcy Road Westmead NSW 2145, Australia;  
46  
47 e-mail: annette.wong@sydney.edu.au  
48

49  
50  
51 Changlin Mei, Department of Nephrology, Kidney Institute, Changzheng Hospital, Second  
52  
53 Military Medical University, No.127, Caoxi Rd, Xuhui District, Shanghai, China; e-mail:  
54  
55 chlmei1954@126.com  
56

1  
2  
3  
4 Tevfik Ecdar, Department of Internal Medicine, Division of Nephrology, Faculty of Medicine,  
5  
6 Istanbul Bilim University, Esentepe, Büyükdere Cd. No:120 34394, Şişli/İstanbul, Turkey; e-  
7  
8 mail: tevfikecdar@yahoo.com  
9

10  
11 Angela Wang, Department of Internal Medicine, Queen Mary Hospital, University of Hong  
12  
13 Kong, 102 Pok Fu Lam Road, Hong Kong; e-mail: aymwang@hku.hk  
14  
15

16  
17 Tze-Wah Kao Division of Nephrology, Department of Internal Medicine, Fu Jen Catholic  
18  
19 University Hospital, No. 69, Guizi Road, Taishan District, New Taipei City, Taiwan; e-mail:  
20  
21 twkao2@ntuh.gov.tw  
22  
23

24  
25 Jenq-Wen Huang, Division of Nephrology, Department of Internal Medicine, National Taiwan  
26  
27 University Hospital and National Taiwan University College of Medicine, No.1, Changde St.,  
28  
29 Zhongzheng Dist., Taipei City 10048, Taiwan; e-mail: jenqwen@gmail.com  
30  
31

32  
33 Gopala Rangan, Department of Renal Medicine, Westmead Hospital, Western Sydney Local  
34  
35 Health District; and Centre for Transplant and Renal Research, Westmead Institute for Medical  
36  
37 Research, The University of Sydney, Westmead, Cnr Hawkesbury Road, and Darcy Road  
38  
39 Westmead NSW 2145, Australia; e-mail: g.rangan@sydney.edu.au  
40  
41

42  
43  
44  
45 **\* Corresponding Author:**  
46

47  
48 Curie Ahn, Department of Internal Medicine, Seoul National University College of Medicine,  
49  
50 Seoul, 110-744, Republic of Korea. Telephone number: +82-2-2072-2222; Fax number: +82-  
51  
52 2-763-6317; E-mail address: curie@snu.ac.kr  
53  
54  
55  
56  
57  
58  
59  
60



1  
2  
3  
4  
5  
6  
7  
8  
9  
10  
11  
12  
13  
14  
15  
16  
17  
18  
19  
20  
21  
22  
23  
24  
25  
26  
27  
28  
29  
30  
31  
32  
33  
34  
35  
36  
37  
38  
39  
40  
41  
42  
43  
44  
45  
46  
47  
48  
49  
50  
51  
52  
53  
54  
55  
56  
57  
58  
59  
60

Running title: Design and Methods of RAPID-ADPKD study

For peer review only

## Abstract

**Introduction:** Autosomal dominant polycystic kidney disease (ADPKD) patients reach end-stage renal disease (ESRD) in their fifth decade on average. For effective treatment and early intervention, identifying subgroups with rapid progression is important in ADPKD. However, there are no epidemiologic data regarding the clinical manifestations and disease progression of ADPKD patients from the Asia-pacific region.

**Methods and analysis:** RAPID-ADPKD (Retrospective epidemiologic study of Asian-Pacific patients with rapid Disease progression of ADPKD) is a multinational retrospective observational cohort study of ADPKD patients in the Asia-pacific area (Australia, China, Hong Kong, South Korea, Taipei, and Turkey). This study was designed to identify the clinical characteristics of ADPKD patients with rapid progression. Adult ADPKD diagnosed by the Unified ultrasound criteria and with estimated glomerular filtration rate (eGFR)  $\geq 45$  mL/min/1.73m<sup>2</sup> at baseline will be included. The cohort will include patients with  $\geq 2$  records of eGFR and at least 24 months follow up data. Demographic information, clinical characteristics, comorbidities, medications, eGFR, radiologic findings that can calculate height-adjusted total kidney volume, ADPKD-related complications and the PRO-PKD score will be collected. Rapid progression will be defined based on the ERA-EDTA guideline. All other patients without any of the criteria are classified as slow progression. The clinical characteristics will be compared between patients with rapid progression and slow progression. Also, the incidence of complications, effects of race and water intake on the renal progression will be analyzed. The planned sample size of the cohort is 1,000 patients, and data from 600 patients have been collected by May 30<sup>th</sup>, 2019.

**Ethics and dissemination:** This study was approved or on process by the Institutional Review

Boards at each participating centers. The result will be presented in the conferences and published as a journal to represent the clinical characteristics, risk factors for disease progression, and patterns of complications in Asian populations with ADPKD.

For peer review only

## Article summary

### Strengths and limitations of this study

The strength of this study is that this is the first collaboration study in the Asia-Pacific region, which will include more than 1,000 patients to identify the clinical characteristics of ADPKD patients with rapid progression.

Detailed clinical information of at least two years of follow-up will be collected including clinical manifestations, laboratory results, renal radiologic findings, and PRO-PKD scores which expect to provide knowledge about the incidence of renal and extra-renal complications, diagnostic pattern, and the effects of ethnicities and water intake on the progression.

Due to the nature of the retrospective observational study, measurement of renal function and kidney volumes measurement methods could not be unified, and follow-up durations and intervals would differ among patients.

We anticipate more collaborating studies among Asia-Pacific countries will be derived from our study, which can benefit the Asia-Pacific ADPKD population.

## Introductions

Autosomal dominant polycystic kidney disease (ADPKD) is the most common hereditary renal disease in all races.<sup>1</sup> About 50% of ADPKD patients progress to end-stage renal disease (ESRD) in their fifth decades, and ADPKD is currently the fourth main cause of ESRD.<sup>2</sup> In addition to renal progression, various renal and extra-renal symptoms and complications occur in ADPKD patients during their life. ADPKD is a heterogeneous set of diseases caused by a mutation in either two genes, *PKD1* and *PKD2*. Patients with *PKD2* mutation show a milder clinical course compared to those with *PKD1* mutation.<sup>3</sup> However even in the same family, with the same germ-line mutation in *PKD1/PKD2* gene, manifestation and severity of disease differ from person to person.<sup>2</sup> These difference in disease manifestation and progression might be due to the influence of various environmental factors in addition to genetic factors.<sup>4</sup> Therefore, finding patients who will develop severe disease is important in the clinical management of ADPKD. Moreover, since the approval of vasopressin V2 receptor antagonists by the US-FDA as the first medication to slow ADPKD progression, identifying the ‘rapid progressor’ has been a crucial step to decide who will benefit from the treatment.<sup>5</sup>

However, there have been only a few studies to characterize the disease nature and to analyze the progression of ADPKD in the Asian-Pacific population (**Table 1**). From the previous studies, a few unique characteristics of the Asian ADPKD population were noticed. About 50%-80% of genetic mutations in *PKD1* or *PKD 2* gene of Asian population were novel compared to previous genetic mutation database based on Western population.<sup>6-8</sup> In addition, differences in other genetic backgrounds, races, climates, cultures, and lifestyles of Asian population can also affect the disease progression differently. Limited data suggest the possibility of faster renal progression in Asian chronic kidney disease (CKD) patients

1  
2  
3  
4 compared to the Western population.<sup>9-11</sup> However previous studies of Asian ADPKD  
5  
6 population were conducted in a single country which under-represented the whole Asian  
7  
8 ADPKD population.<sup>12-27</sup> Moreover, to date, the studies to identify the rapid progression  
9  
10 population of ADPKD patients were mostly conducted in the Western population.<sup>5, 28-30</sup>  
11  
12 Therefore, a larger number, multicenter study to find the clinical characteristics of Asian  
13  
14 ADPKD population and to define the risk factors for the rapid progression of the disease are  
15  
16 needed for Asian ADPKD patients.  
17  
18  
19  
20

21 Therefore, the aim of this multinational, multicenter, retrospective cohort study was to  
22  
23 determine the clinical characteristics of rapidly progressing ADPKD patients in the Asia-  
24  
25 Pacific region using the current recommendation for identification of rapid progression.<sup>5</sup> The  
26  
27 data of clinical characteristics, complications, and disease courses that represent ADPKD  
28  
29 patients in the Asia-Pacific region will also be collected. In addition, an exploratory goal of  
30  
31 this project is to determine whether there are racial differences in disease progression, and thus  
32  
33 contribute to a baseline knowledge to inform future studies in this group of patients.  
34  
35  
36  
37  
38  
39  
40

## 41 **Methods and Analysis**

### 42 **Study design**

43  
44  
45 The RAPID-ADPKD (**R**etrospective epidemiologic study of **A**sian-**P**acific patients with **r**apid  
46  
47 **D**isease progression of **A**utosomal **D**ominant **P**olycystic **K**idney **D**isease) is a multinational  
48  
49 retrospective observational cohort study. This study was designed to determine the prevalence  
50  
51 of the rapid progressor category of ADPKD patients in the Asia-pacific region based on the  
52  
53 change of renal function, kidney size, and progression to ESRD.  
54  
55  
56  
57  
58  
59  
60

## Organization

This study will enroll ADPKD patients who have visited one of six hospitals from six nations in the Asia-pacific area: ( i ) Australia: Westmead Hospital, Westmead; ( ii ) China: Changzheng Hospital of Shanghai; ( iii ) Hong Kong: Queen Mary Hospital of Hong Kong; ( iv ) South Korea: Seoul National University Hospital of South Korea; ( v ) Taiwan: National Taiwan University hospital of Taipei; and ( vi ) Turkey: Istanbul Bilim University of Turkey.

## Study population

After retrospectively reviewing the patients' data from each hospital, we will enroll patients  $\geq 18$  years old ( $\geq 19$  years old for Taiwan patients due to different age criteria for the adults) adult ADPKD patients with estimated glomerular filtration rate (eGFR)  $\geq 45$  mL/min/1.73m<sup>2</sup> at the index date of the study. To analyze the sufficient follow-up duration in each patient in both retrospective and possible next step study, we planned to enroll ADPKD patients with relatively preserved renal function. The index date is the first available date of reviewed medical records between January 2010 and the enrollment period. The enrolled patients are diagnosed ADPKD patients based on Unified ultrasound criteria for the patients with ADPKD family history<sup>31</sup>: at least two (unilateral or bilateral) renal cysts in age of 18-29, at least two cysts in each kidney in age of 30-59 year old and more than 4 bilateral renal cysts in age  $\geq 60$  year old. For the patients without a family history of ADPKD, the clinical diagnosis of ADPKD based on typical radiologic findings and/or clinical evaluation will be also accepted. The patients should have at least two clinical visits with eGFR measurements between January 1<sup>st</sup>, 2010 and the time at enrollment. In addition, at the time of enrollment, patients should have followed the center during the last 24 months. Patients should also have at least two-year clinical records of follow-ups from the index date. **(Figure 1)**. Patients with severe heart failure (with symptoms of New

1  
2  
3  
4 York heart association (NYHA) class 3 and 4), severe liver disease (Child-pugh class B or C),  
5  
6 chronic inflammatory disease, diabetic nephropathy, vascular disease and/or other  
7  
8 comorbidities that can affect renal function will be excluded based on each clinician's judgment.  
9  
10  
11 Active cancer patients who underwent chemotherapy during the observation period will be  
12  
13 excluded from the study. Any medical or surgical conditions that can affect renal function or  
14  
15 kidney volume will be excluded as well. The expected sample size of this multinational  
16  
17 retrospective observational cohort is more than 1,000 patients.  
18  
19

### 20 21 **Data collection**

22  
23  
24 Demographic information at index dates such as gender, date of birth, race, height, and body  
25  
26 weight will be collected. Comorbid conditions including diabetes mellitus, dyslipidemia,  
27  
28 hypertension, valvular heart disease, pericardial effusion or left ventricular hypertrophy based  
29  
30 on echocardiography, chronic pulmonary disease, coronary artery disease, cerebrovascular  
31  
32 disease, and cancer will be investigated. In addition, blood pressure, smoking history and CKD  
33  
34 stage based on CKD-EPI eGFR at index date calculated using the formula of  
35  
36  $eGFR = 141 \times \min(\text{Scr} \times 0.0113/k, 1)^\alpha \times \max(\text{Scr} \times 0.0113/k, 1)^{-1.209} \times 0.993^{\text{Age}} \times 1.018$  [if  
37  
38 female]  $\times 1.159$  [if black], where Scr is serum creatinine, k is 0.7 for females and 0.9 for  
39  
40 males,  $\alpha$  is -0.329 for females and -0.411 for males, min indicates the minimum of Scr/k or 1,  
41  
42 and max indicates the maximum of Scr/k or 1,<sup>32</sup> family history of ESRD, medications (anti-  
43  
44 hypertensive agents including calcium channel blocker, angiotensin converting enzyme,  
45  
46 angiotensin receptor blocker and beta blocker, uric acid lowering agent, anti-diabetic agents  
47  
48 including metformin, DPP4 inhibitor and SGLT2 inhibitor, lipid lowering agents including  
49  
50 statins and others) and laboratory results (serum albumin, total bilirubin, cholesterol, high  
51  
52 density lipid, low density lipid, triglyceride, ALT, AST, sodium, potassium, chloride, blood  
53  
54  
55  
56  
57  
58  
59  
60



1  
2  
3  
4 urea nitrogen, glucose and uric acid) will be gathered. At the index date and during the follow  
5  
6 up visits, serum creatinine, urine protein/creatinine ratio, height-adjusted total kidney volume  
7  
8 (htTKV) from radiologic findings of MRI, CT or ultrasound sonography, renal and extra-renal  
9  
10 ADPKD-related complications (cyst infection, events or image diagnosed hemorrhagic cysts,  
11  
12 proteinuria, kidney stone, gross hematuria, microscopic hematuria, chronic pain, upper urinary  
13  
14 tract infection, hypertension, hyperuricemia, hernia, liver cysts, intracranial aneurysms,  
15  
16 subarachnoid hemorrhage, abdominal aorta aneurysms, and infertility) and procedure  
17  
18 (nephrectomy, sclerotherapy, embolization, renal replacement therapy, hepatectomy, liver  
19  
20 transplantation, embolization, fenestration and intervention for intracranial aneurysm) will be  
21  
22 investigated.  
23  
24  
25  
26  
27

28 From the reviewed data, the PRO-PKD score and event information including ESRD, major  
29  
30 cardiovascular events (myocardial infarction, hospitalization for unstable angina, transient  
31  
32 ischemic attack and stroke, heart failure requiring hospitalization and peripheral artery  
33  
34 revascularization procedure), and death will be collected using an electronic case report form.  
35  
36 PRO-PKD score will be calculated based on the followings: score 1 for male, score 2 for  
37  
38 hypertension before 35 years of age, score 2 for having first urologic event such as macroscopic  
39  
40 hematuria, flank pain or cyst infection before 35 years of age, score 2 for non-truncating *PKDI*  
41  
42 mutation and score 4 for truncating *PKDI* mutation based on genetic testing results.<sup>28</sup> (**Figure**  
43  
44  
45  
46  
47  
48  
49  
50  
51  
52  
53  
54  
55  
56  
57  
58  
59  
60  
**1**)

### **Serum creatinine measurement and eGFR calculation**

52 To define the patients with rapid progression, standardizing creatinine measurement is  
53  
54 important. However, this is a multi-national retrospective study, and serum creatinine  
55  
56 measuring methods are inevitably different from centers and dates. To reduce the error in the  
57  
58  
59  
60

1  
2  
3  
4 interpretation of eGFR caused by various creatinine measurement methods, in addition to  
5 collecting serum creatinine value itself, we will also collect the creatinine measurement  
6 methods such as Jaffe methods (calibrated with isotopic dilution mass spectrometry),  
7 enzymatic methods, alkaline picrate kinetic, alkaline picrate rate-blanked with compensation  
8 and alkaline picrate rate-blanked without compensation for the supporting information during  
9 the analysis. In the eGFR calculation, if the creatinine measurement was not calibrated with  
10 isotopic dilution mass spectrometry, eGFR will be calculated using the 5% reduced value of  
11 the recorded serum creatinine.<sup>33</sup> All eGFR will be calculated based on the CKD-EPI equation.<sup>32</sup>  
12  
13  
14  
15  
16  
17  
18  
19  
20  
21  
22

### 23 **Total kidney volume calculation**

24  
25  
26 In order to collect the maximal amount of the htTKV data, we will gather information about  
27 the renal images from MRI, CT, or ultrasound undertaken during the follow-ups. The imaging  
28 dates and methods will be collected. If the htTKV was already measured using the images, the  
29 value and the measurement methods of total kidney volume (TKV) (ellipsoid, stereological  
30 measurement or other) will be collected. If there is no measurement done previously, the  
31 htTKV will be calculated using the ellipsoid methods.<sup>34</sup> For the analysis, htTKV calculated by  
32 ellipsoid methods would be used mainly to define the rapid progression. However, if other  
33 htTKV calculating methods such as stereological or planimetry are used in the same patient  
34 using the same imaging methods, the progression will also be determined using the values. In  
35 both cross-section and longitudinal analysis, the htTKV data will be analyzed and represented  
36 according to TKV measurement methods as both separately and all-together.  
37  
38  
39  
40  
41  
42  
43  
44  
45  
46  
47  
48  
49  
50

### 51 **Follow-up**

52  
53  
54 Follow-up duration will be defined from the index date until the enrolled date. Date of events  
55 such as ESRD, major cardiovascular events, and death during the follow-up will be collected  
56  
57  
58  
59  
60

1  
2  
3  
4 and used for the analysis. (Figure 1)  
5  
6

### 7 Outcome variables

8  
9  
10 The cohort will include patients with more than two records of eGFR and,  $\geq 24$  months of follow  
11 up. The primary outcome of the study is the rate of kidney function decline among the Asia-  
12 Pacific ADPKD population. Changes in eGFR slope during the follow up will be calculated  
13 using generalized linear mixed model and compare between patients with rapid progression  
14 and slow progressor in Asia-Pacific ADPKD population. Rapid progression will be defined as  
15 when any of following criteria are met, based on ERA-EDTA recommendations<sup>5</sup>: (i) an annual  
16 eGFR decline  $\geq 5$  mL/min/1.73m<sup>2</sup> within 1 year and/or  $\geq 2.5$  mL/min/1.73m<sup>2</sup> per year over a  
17 period of 5 years; (ii) an increase in htTKV  $\geq 5\%$  per year measured from  $\geq 3$  radiologic images;  
18 (iii) Mayo classification 1C, 1D, or 1E or kidney length from ultrasonography of  $>16.5$  cm;  
19 (iv) *PKDI* truncated mutation with early symptoms (PRO-PKD score  $> 6$ ). The remainder of  
20 the patients will be classified as slow progressors. The secondary outcome of the study is to  
21 determine the difference in other clinical characteristics including TKV changes, complication  
22 rate, age of complication presentation and treatment aspects between patients with rapid and  
23 slow progression. In addition, the subgroup analysis according to age groups, ethnicities will  
24 be conducted in secondary outcome measures.  
25  
26  
27  
28  
29  
30  
31  
32  
33  
34  
35  
36  
37  
38  
39  
40  
41  
42  
43  
44

### 45 Data collection, monitoring, and management

46  
47  
48 Whole data collection and monitoring will be managed by Contract Research Organization  
49 (CRO). The person who enters data at each center will be educated by the clinical research  
50 associate (CRA) before enrollment of the first patients from each center for the unity of the  
51 data and to minimize the data input errors. Depending on the inclusion and exclusion criteria,  
52 patients' eligibility for the study and final inclusion will be decided by the clinician at each  
53  
54  
55  
56  
57  
58  
59  
60

1  
2  
3  
4 center. All the retrospective data will be collected using an electronic case report form (eCRF).  
5  
6 During the data collection, the CRA will visit the center during the input time period and keep  
7  
8 communicating with the person at centers to discover the data input errors earlier and handle  
9  
10 the possible upcoming issues. When the data are entered, internal monitoring will be conducted  
11  
12 at each center. After the data are entered from all centers, external monitoring will be performed  
13  
14 by the CRO. The missing data of the continuous variable will be categorized as the ‘missing’  
15  
16 category. Currently, the data from 600 patients have been collected by May 30<sup>th</sup>, 2019.  
17  
18  
19  
20

### 21 **Statistical methods**

22  
23  
24 After all the data are entered and monitored, the statistical analysis will be conducted with both  
25  
26 the total population and national levels. If a certain variable is not able to be collected at a  
27  
28 specific center, the analysis of the variable will be done after excluding the missing values. The  
29  
30 analysis will be done under the guideline of the International Committee on Harmonisation E9:  
31  
32 Statistical principles for clinical trials.<sup>35</sup>  
33  
34  
35

36 For the primary analysis, all the clinical variables will be analyzed according to two  
37  
38 categories: the rapid progressor and the slow progressor. Additional analysis will be conducted  
39  
40 according to CKD stages and age groups ( $\leq 30$  years old, 31 to 40 years old, 41 to 50 years old  
41  
42 and  $\geq 51$  years old), countries, and races. For the statistical analysis of the categorical variables,  
43  
44 Chi-square test will be used. With the continuous variables, Student’s t-test and Analysis of  
45  
46 Variance will be conducted. For the comparison of changes of eGFR and htTKV, the  
47  
48 generalized linear mixed model will be used to adjust the baseline difference between the  
49  
50 individuals. The event data will be analyzed using Cox-proportional hazard model. The value  
51  
52 of  $P < 0.05$  will be interpreted as statistically significant. For multiple comparisons, the Holm-  
53  
54 Bonferroni method will be used.  
55  
56  
57  
58  
59  
60

### **Clinical significance of the study**

This RAPID-ADPKD study has been designed to represent the clinical data profile of the ADPKD population in the Asia-Pacific region. In this study, ADPKD patients from six different countries in Asia-Pacific region, Australia, China, Hong Kong, South Korea, Taiwan, and Turkey, will be included and will have heterogeneity ADPKD population consisted of different races such as Han Chinese, Korean, Turks, Kurds, Taiwanese aborigines, Caucasians, etc. By using the data from ADPKD patients in six Asia-Pacific countries, we aim to identify the risk factors for the rapid disease progression of Asian-Pacific ADPKD patients. To address the renal progression of the study population, htTKV and eGFR of enrolled patients' will be retrospectively reviewed and collected.

We also expect to analyze the current status of Asian-Pacific ADPKD patients, such as the pattern of extra-renal complication, diagnosis, treatment, and medical resource utilization in Asian-Pacific ADPKD patients. Patients with ADPKD are known to have a higher risk of hypertension and cardiovascular events compared to the general population.<sup>36-38</sup> However, in the CKD population, there have been studies that reported that hypertension is better controlled and the incidence of cardiovascular events is lower in Asian population compared to the Western CKD population.<sup>39-41</sup> Whether the incidence of hypertension and cardiovascular event are relatively low in Asian ADPKD patients compared to the Western population as in other CKD patients are unknown. In addition, the Asian population has relatively smaller body mass compared to the western population, and there might be a higher incidence of complications due to severe polycystic liver disease and organomegaly in Asian ADPKD patients. Using the retrospective data from RAPID-ADPKD study, we are planning to analyze the incidence of extra-renal complications and seek the meaning in the Asian ADPKD population. Also the

1  
2  
3  
4 medical resource utilization is influenced by the medical system and the government  
5 reimbursement system. Therefore, the diagnostic pattern and assessment method of disease  
6 progression during the follow-up would be different in Asian-Pacific ADPKD countries  
7 compared to Western countries. For example, MRI is a gold standard tool for total kidney  
8 volume measurement, but it is not reimbursed by the medical system in most Asian-Pacific  
9 countries and ultrasonography, or computed tomography is preferred in the clinical setting of  
10 Asia Pacific regions. Results from the current study would give us much information about  
11 current assessment protocol in Asian ADPKD population, which would be valuable data in  
12 planning for future clinical studies in Asian ADPKD patients.  
13  
14  
15  
16  
17  
18  
19  
20  
21  
22  
23  
24  
25

26 In this study, the ethnical data will also be collected for the analysis of racial differences in  
27 Asian ADPKD population. Only a couple of studies evaluated ADPKD progression in racial  
28 differences. Freedman et al., reported that African American ADPKD patients showed faster  
29 renal progression compared to Caucasian ADPKD patients in the United States.<sup>42, 43</sup> In the  
30 respect of Asian population, Muto et al. reported from the Japanese subset study of TEMPO  
31 4:3, the response to Tolvaptan on the annual rate of TKV growth was different in Japanese  
32 population compared to that of total population.<sup>20</sup> Further studies regarding the racial difference  
33 on the disease would give us an in-depth understanding of disease pathophysiology and the  
34 identification of the rapid progressor. Therefore, the effect of race on the clinical manifestation  
35 and renal progression that could be analyzed from RAPID-ADPKD study would be another  
36 valuable finding.  
37  
38  
39  
40  
41  
42  
43  
44  
45  
46  
47  
48  
49  
50

51 It is known that the serum level of antidiuretic hormone vasopressin is elevated at the status  
52 of dehydration and this is related to cyst growths in ADPKD.<sup>44</sup> Based on this, sufficient water  
53 intake, as well as vasopressin V2 receptor antagonist, has been applied to slow renal  
54  
55  
56  
57  
58  
59  
60

1  
2  
3  
4 progression in ADPKD patients.<sup>4, 45</sup> Even though the beneficial effect of increased water intake  
5  
6 has been supported by animal studies, there are not enough human studies to support the  
7  
8 recommendation. Therefore, currently, a randomized controlled trial, PREVENT-ADPKD to  
9  
10 determine the effect of increased water intake in ADPKD is underway.<sup>45</sup> In this RAPID-  
11  
12 ADPKD study, by collecting and analyzing the data of specific gravity of spot urine as a marker  
13  
14 of water intake in a relatively large number of patients, we expect to provide baseline data for  
15  
16 the effect of the water intake on ADPKD patients.  
17  
18  
19  
20

### 21 **Limitations**

22  
23  
24 Since this is a retrospective observational cohort study from six different countries, we expect  
25  
26 several limitations will exist. As we mentioned earlier, eGFR and htTKV, the two major  
27  
28 indicators of disease progression in ADPKD, cannot be measured or interpreted by a unified  
29  
30 method. Additionally, follow-up intervals or htTKV measurements will be different among  
31  
32 different participating countries. In addition, there might be an insufficient number of patients  
33  
34 who could provide genetic data, which is a known important prognostic marker of renal  
35  
36 progression in ADPKD. Collecting data of a minimum of two years follow up would not be  
37  
38 sufficient to use the rapid progressor categories that have been suggested in the ERA-EDTA  
39  
40 guideline. Also relatively preserved renal function population would not show enough renal  
41  
42 changes during the follow-ups of minimal two years of data. Also, we could not evaluate the  
43  
44 renal function using cystatin C or inulin clearance which would be more appropriate methods  
45  
46 especially for the sarcopenic patients with severe polycystic liver disease. Nevertheless, we  
47  
48 believe that our analysis using eGFR and htTKV would become valuable findings since we  
49  
50 will collect data from actual clinical practice and a large number of patients across different  
51  
52 nations. Even though there are some limitations due to the nature of multinational retrospective  
53  
54  
55  
56  
57  
58  
59  
60

1  
2  
3  
4 observational study, we expect our results will give us valuable knowledge about clinical  
5 characteristics and the rapid progressor of Asian ADPKD patients and basic information of  
6 current practice in Asia-Pacific regions for the first time. Based on the findings from this study,  
7 we hope other well-organized multinational prospective studies are designed and conducted to  
8 find clinical characteristics and unique risk factors for the Asian ADPKD population.  
9  
10  
11  
12  
13  
14  
15  
16  
17  
18

### 19 **Ethics and dissemination**

20  
21  
22 The basic protocol of the study was approved by most of participating center's Institutional  
23 Review Boards (IRB) (Seoul National University Hospital, Seoul No 1801-114-917; Istanbul  
24 Bilim University Hospital, Turkey No 19.12.2017/65-11; National Taiwan University Hospital,  
25 Taiwan, No 201801072RSA; Westmead Hospital, Australia No LNR/17/WMEAD/444;  
26 Shanghai ChangZheng Hospital, China, No 2018SL025) and on process with Queen Mary  
27 Hospital of Hong Kong. This study is a retrospective observational cohort study, and there are  
28 no interventions to the study subjects. Therefore, this study presents no more than minimal risk  
29 of harm to the study subjects, and all IRB approved the consent waiver. All the collected data  
30 for the study will be handled according to non-disclosure agreement and privacy legislation.  
31 The data will be stored for at least five years after the completion of the enrollment but can be  
32 deleted according to each nations' privacy regulations. The result will be presented in the  
33 conferences and published as a journal to represent the clinical characteristics, risk factors for  
34 disease progression and patterns of complications in Asian populations with ADPKD.  
35  
36  
37  
38  
39  
40  
41  
42  
43  
44  
45  
46  
47  
48  
49  
50  
51  
52  
53  
54  
55

### 56 **Patient and Public Involvement**



1  
2  
3  
4 In this study, patients or the public were not involved in the design, or conduct, or reporting,  
5  
6 or dissemination of our research.  
7  
8  
9  
10

### 11 12 **List of abbreviations**

13  
14  
15 ADPKD Autosomal dominant polycystic kidney disease

16  
17  
18 CKD Chronic kidney disease

19  
20  
21 CRA Clinical research associate

22  
23  
24 CRO Contract research organization

25  
26  
27 eCRF Electronic case report form

28  
29  
30 eGFR Estimated glomerular filtration rate

31  
32  
33 ESRD End-stage renal disease

34  
35  
36 htTKV Height adjusted total kidney volume

37  
38  
39 IRB Institutional Review Boards

40  
41  
42 RAPID-ADPKD Retrospective epidemiologic study of Asian-Pacific patients with rapid  
43  
44 Disease progression of Autosomal Dominant Polycystic Kidney Disease

45  
46  
47 TKV Total kidney volume

### 48 49 50 51 52 53 **Acknowledgements**

54  
55  
56 None.

## References

- 1 Torres VE, Harris PC, Pirson Y. Autosomal dominant polycystic kidney disease. *Lancet* 2007;369(9569):1287-301.
- 2 Torres VE, Harris PC. Autosomal dominant polycystic kidney disease: the last 3 years. *Kidney Int* 2009;76(2):149-68.
- 3 Hwang YH, Conklin J, Chan W, et al. Refining Genotype-Phenotype Correlation in Autosomal Dominant Polycystic Kidney Disease. *J Am Soc Nephrol* 2016;27(6):1861-8.
- 4 Chapman AB, Devuyst O, Eckardt KU, et al. Autosomal-dominant polycystic kidney disease (ADPKD): executive summary from a Kidney Disease: Improving Global Outcomes (KDIGO) Controversies Conference. *Kidney Int* 2015;88(1):17-27.
- 5 Gansevoort RT, Arici M, Benzing T, et al. Recommendations for the use of tolvaptan in autosomal dominant polycystic kidney disease: a position statement on behalf of the ERA-EDTA Working Groups on Inherited Kidney Disorders and European Renal Best Practice. *Nephrol Dial Transplant* 2016;31(3):337-48.
- 6 Choi R, Park HC, Lee K, et al. Identification of novel PKD1 and PKD2 mutations in Korean patients with autosomal dominant polycystic kidney disease. *BMC Med Genet* 2014;15:129.
- 7 Xu D, Ma Y, Gu X, et al. Novel Mutations in the PKD1 and PKD2 Genes of Chinese Patients with Autosomal Dominant Polycystic Kidney Disease. *Kidney Blood Press Res* 2018;43(2):297-309.
- 8 Chang MY, Chen HM, Jenq CC, et al. Novel PKD1 and PKD2 mutations in Taiwanese patients with autosomal dominant polycystic kidney disease. *J Hum Genet* 2013;58(11):720-7.
- 9 Barbour SJ, Er L, Djurdjev O, Karim M, Levin A. Differences in progression of CKD

1  
2  
3  
4  
5 and mortality amongst Caucasian, Oriental Asian and South Asian CKD patients. *Nephrol Dial*  
6  
7 *Transplant* 2010;25(11):3663-72.

8  
9  
10 Mathur R, Dreyer G, Yaqoob MM, Hull SA. Ethnic differences in the progression of  
11  
12 chronic kidney disease and risk of death in a UK diabetic population: an observational cohort  
13  
14 study. *BMJ Open* 2018;8(3):e020145.

15  
16  
17 Barbour SJ, Cattran DC, Kim SJ, et al. Individuals of Pacific Asian origin with IgA  
18  
19 nephropathy have an increased risk of progression to end-stage renal disease. *Kidney Int*  
20  
21 2013;84(5):1017-24.

22  
23  
24 Ravine D, Walker RG, Gibson RN, et al. Phenotype and genotype heterogeneity in  
25  
26 autosomal dominant polycystic kidney disease. *Lancet* 1992;340(8831):1330-3.

27  
28  
29 Liu Y, Zhang H, Zhong H. Systemic manifestations of adult polycystic kidney disease:  
30  
31 an analysis of 205 cases. *Zhonghua Nei Ke Za Zhi* 1995;34(9):612-5.

32  
33  
34 Chen D, Ma Y, Wang X, et al. Clinical characteristics and disease predictors of a large  
35  
36 Chinese cohort of patients with autosomal dominant polycystic kidney disease. *PLoS One*  
37  
38 2014;9(3):e92232.

39  
40  
41 Jin M, Xie Y, Chen Z, et al. System analysis of gene mutations and clinical phenotype  
42  
43 in Chinese patients with autosomal-dominant polycystic kidney disease. *Sci Rep* 2016;6:35945.

44  
45  
46 Meng J, Xu Y, Li A, et al. Clinical Features of 167 Inpatients with Autosomal  
47  
48 Dominant Polycystic Kidney Disease at a Single Center in China. *Med Sci Monit.*  
49  
50 2018;24:6498-505.

51  
52  
53  
54  
55  
56  
57  
58  
59  
60  
17 Alsaedi AJ, Jamal H, Al-Windawi S. The prevalence of hypertension and  
nephrolithiasis in a sample of Iraqi patients with autosomal-dominant polycystic kidney disease.  
*Saudi J Kidney Dis Transpl* 2011;22(5):1044-5.

- 1  
2  
3  
4  
5 18 Higashihara E, Horie S, Muto S, Mochizuki T, Nishio S, Nutahara K. Renal disease  
6 progression in autosomal dominant polycystic kidney disease. *Clin Exp Nephrol*  
7  
8 2012;16(4):622-8.  
9  
10  
11  
12 19 Kurashige M, Hanaoka K, Imamura M, et al. A comprehensive search for mutations  
13 in the PKD1 and PKD2 in Japanese subjects with autosomal dominant polycystic kidney  
14 disease. *Clin Genet* 2015;87(3):266-72.  
15  
16  
17 20 Muto S, Kawano H, Higashihara E, et al. The effect of tolvaptan on autosomal  
18 dominant polycystic kidney disease patients: a subgroup analysis of the Japanese patient subset  
19 from TEMPO 3:4 trial. *Clin Exp Nephrol* 2015;19(5):867-77.  
20  
21  
22 21 Higashihara E, Yamamoto K, Kaname S, et al. Age- and height-adjusted total kidney  
23 volume growth rate in autosomal dominant polycystic kidney diseases. *Clin Exp Nephrol*  
24 2019;23(1):100-11.  
25  
26  
27 22 Rabbani MA, Ali SS, Murtaza G, et al. Clinical presentation and outcome of autosomal  
28 dominant polycystic kidney disease in Pakistan: a single center experience. *J Pak Med Assoc*  
29 2008;58(6):305-9.  
30  
31  
32 23 Kim H, Park HC, Ryu H, et al. Clinical Correlates of Mass Effect in Autosomal  
33 Dominant Polycystic Kidney Disease. *PLoS One* 2015;10(12):e0144526.  
34  
35  
36 24 Kim H, Koh J, Park SK, et al. Baseline Characteristics of the Autosomal Dominant  
37 Polycystic Kidney Disease Subcohort of the KoreaN Cohort Study for Outcomes in Patients  
38 With Chronic Kidney Disease (KNOW-CKD). *Nephrology (Carlton)* 2018.  
39  
40  
41 25 Sung PH, Chiang HJ, Yang YH, Chen CJ, Chiang JY, Yip HK. An association between  
42 autosomal-dominant polycystic kidney disease and the risk of acute myocardial infarction in  
43 Asian population - results of a nationwide study. *Oncotarget* 2017;8(12):19365-75.  
44  
45  
46  
47  
48  
49  
50  
51  
52  
53  
54  
55  
56  
57  
58  
59  
60

- 1  
2  
3  
4  
5 26 Kazancioglu R, Ecdar T, Altintepe L, et al. Demographic and clinical characteristics  
6 of patients with autosomal dominant polycystic kidney disease: a multicenter experience.  
7  
8  
9  
10 *Nephron Clin Pract* 2011;117(3):c270-5.
- 11  
12 27 Ozkok A, Akpınar TS, Tufan F, et al. Clinical characteristics and predictors of  
13 progression of chronic kidney disease in autosomal dominant polycystic kidney disease: a  
14 single center experience. *Clin Exp Nephrol* 2013;17(3):345-51.
- 15  
16  
17  
18 28 Cornec-Le Gall E, Audrezet MP, Rousseau A, et al. The PROPKD Score: A New  
19 Algorithm to Predict Renal Survival in Autosomal Dominant Polycystic Kidney Disease. *J Am*  
20  
21  
22  
23 *Soc Nephrol* 2016;27(3):942-51.
- 24  
25  
26 29 Irazabal MV, Rangel LJ, Bergstralh EJ, et al. Imaging classification of autosomal  
27 dominant polycystic kidney disease: a simple model for selecting patients for clinical trials. *J*  
28  
29  
30  
31 *Am Soc Nephrol* 2015;26(1):160-72.
- 32  
33 30 Schrier RW, Brosnahan G, Cadnapaphornchai MA, et al. Predictors of autosomal  
34 dominant polycystic kidney disease progression. *J Am Soc Nephrol* 2014;25(11):2399-418.
- 35  
36  
37 31 Pei Y, Obaji J, Dupuis A, et al. Unified criteria for ultrasonographic diagnosis of  
38 ADPKD. *J Am Soc Nephrol* 2009;20(1):205-12.
- 39  
40  
41  
42 32 Levey AS, Stevens LA, Schmid CH, et al. A new equation to estimate glomerular  
43 filtration rate. *Ann Intern Med* 2009;150(9):604-12.
- 44  
45  
46  
47 33 Skali H, Uno H, Levey AS, Inker LA, Pfeffer MA, Solomon SD. Prognostic  
48 assessment of estimated glomerular filtration rate by the new Chronic Kidney Disease  
49 Epidemiology Collaboration equation in comparison with the Modification of Diet in Renal  
50 Disease Study equation. *Am Heart J* 2011;162(3):548-54.
- 51  
52  
53  
54  
55  
56 34 O'Neill WC, Robbin ML, Bae KT, et al. Sonographic assessment of the severity and  
57  
58  
59  
60

1  
2  
3  
4  
5 progression of autosomal dominant polycystic kidney disease: the Consortium of Renal  
6 Imaging Studies in Polycystic Kidney Disease (CRISP). *Am J Kidney Dis* 2005;46(6):1058-64.

7  
8  
9  
10 35 Lewis JA. Statistical principles for clinical trials (ICH E9): an introductory note on an  
11 international guideline. *Stat Med* 1999;18(15):1903-42.

12  
13  
14 36 Helal I, Reed B, Mettler P, et al. Prevalence of cardiovascular events in patients with  
15 autosomal dominant polycystic kidney disease. *Am J Nephrol* 2012;36(4):362-70.

16  
17  
18 37 Massella L, Mekahli D, Paripovic D, et al. Prevalence of Hypertension in Children  
19 with Early-Stage ADPKD. *Clin J Am Soc Nephrol* 2018;13(6):874-83.

20  
21  
22 38 Fick GM, Johnson AM, Hammond WS, Gabow PA. Causes of death in autosomal  
23 dominant polycystic kidney disease. *J Am Soc Nephrol* 1995;5(12):2048-56.

24  
25  
26 39 Alencar de Pinho N, Levin A, Fukagawa M, et al. Considerable international variation  
27 exists in blood pressure control and antihypertensive prescription patterns in chronic kidney  
28 disease. *Kidney Int* 2019;

29  
30  
31 40 Tanaka K, Watanabe T, Takeuchi A, et al. Cardiovascular events and death in Japanese  
32 patients with chronic kidney disease. *Kidney Int* 2017;91(1):227-34.

33  
34  
35 41 Jolly SE, Burrows NR, Chen SC, et al. Racial and ethnic differences in mortality  
36 among individuals with chronic kidney disease: results from the Kidney Early Evaluation  
37 Program (KEEP). *Clin J Am Soc Nephrol* 2011;6(8):1858-65.

38  
39  
40 42 Freedman BI, Soucie JM, Chapman A, Krisher J, McClellan WM. Racial variation in  
41 autosomal dominant polycystic kidney disease. *Am J Kidney Dis* 2000;35(1):35-9.

42  
43  
44 43 Murphy EL, Dai F, Blount KL, et al. Revisiting racial differences in ESRD due to  
45 ADPKD in the United States. *BMC Nephrol* 2019;20(1):55.

46  
47  
48 44 Gattone VH, 2nd, Wang X, Harris PC, Torres VE. Inhibition of renal cystic disease

1  
2  
3  
4  
5 development and progression by a vasopressin V2 receptor antagonist. *Nat Med*  
6  
7 2003;9(10):1323-6.  
8

9  
10 45 Wong ATY, Mannix C, Grantham JJ, et al. Randomised controlled trial to determine  
11 the efficacy and safety of prescribed water intake to prevent kidney failure due to autosomal  
12 dominant polycystic kidney disease (PREVENT-ADPKD). *BMJ Open* 2018;8(1):e018794.  
13  
14  
15

### 16 17 18 19 20 **Authors' contribution**

21  
22  
23 HR participated in design of the work, data acquisition, data analysis and drafting the work,  
24 HCP and YKO participated in the design of the work, interpretation of data and revising the  
25 manuscript. IS, AW, CM, TE, AW, TWK and JWH have been worked in the design of the  
26 work, acquisition and monitoring the data for the improvement of the accuracy. GR participated  
27 in the design of the work, acquisition, interpretation of the data, revising the manuscript and  
28 final approval of the manuscript to be published. CA designed the study, gathered study  
29 collaborators and finalizing the manuscript. All authors read and approved the manuscript.  
30  
31  
32  
33  
34  
35  
36  
37  
38  
39  
40  
41  
42

### 43 **Funding Statement**

44  
45  
46 This work was supported by Korea Otsuka International Asia Arab Co., Ltd. This funding  
47 source had no role in the design of this study and will not have any role during its execution,  
48 analyses, interpretation of the data, or decision to submit results.  
49  
50  
51  
52  
53  
54  
55  
56

### 57 **Competing interests**

1  
2  
3  
4  
5 The study was supported by Korea Otsuka International Asia Arab Co., Ltd. and GR received  
6  
7 grant support from Danone Nutricia research for clinical research into ADPKD  
8  
9  
10  
11  
12

### 13 14 **License Statement**

15  
16  
17 I, the Submitting Author has the right to grant and does grant on behalf of all authors of the  
18  
19 Work (as defined in the below author licence), an exclusive licence and/or a non-exclusive  
20  
21 licence for contributions from authors who are: i) UK Crown employees; ii) where BMJ has  
22  
23 agreed a CC-BY licence shall apply, and/or iii) in accordance with the terms applicable for US  
24  
25 Federal Government officers or employees acting as part of their official duties; on a worldwide,  
26  
27 perpetual, irrevocable, royalty-free basis to BMJ Publishing Group Ltd (“BMJ”) its licensees  
28  
29 and where the relevant Journal is co-owned by BMJ to the co-owners of the Journal, to publish  
30  
31 the Work in BMJ Open and any other BMJ products and to exploit all rights, as set out in our  
32  
33 licence.  
34  
35  
36  
37  
38  
39  
40  
41  
42  
43  
44  
45  
46  
47  
48  
49  
50

### 51 **Figure Legends**

52  
53  
54 **Figure 1. The planned structure and the data collections in RAPID-ADPKD study**  
55  
56  
57  
58  
59  
60

### 51 **Table Legends**

52  
53  
54 **Table 1. The summary of studies regarding clinical characteristic or renal progression in**  
55  
56 **Asian ADPKD patients**  
57  
58  
59  
60



| Country   | Subject of the journal                                                                   | Number of analyzed patients | Study type                       | Published year | Reference |
|-----------|------------------------------------------------------------------------------------------|-----------------------------|----------------------------------|----------------|-----------|
| Australia | Genotype-Phenotype correlation                                                           | 285                         | Cross-sectional study            | 1992           | 12        |
| China     | Clinical manifestation                                                                   | 205                         | Cross-sectional study            | 1995           | 13        |
| China     | Clinical characteristics and disease progression                                         | 541                         | Prospective cohort study         | 2014           | 14        |
| China     | Genotype-Phenotype correlation                                                           | 148                         | Cross-sectional study            | 2016           | 15        |
| China     | Clinical feature of inpatient ADPKD patients                                             | 168                         | Retrospective study              | 2018           | 16        |
| Iraq      | Clinical manifestation                                                                   | 30                          | Cross-sectional study            | 2011           | 17        |
| Japan     | Renal progression                                                                        | 255                         | Retrospective study              | 2012           | 18        |
| Japan     | Genotype and renal progression                                                           | 112                         | Retrospective study              | 2014           | 19        |
| Japan     | Renal progression and effect of Tolvaptan in Japanese patient subset from TEMPO3:4 trial | 177                         | Subgroup study of clinical trial | 2015           | 20        |
| Japan     | Clinical characteristics according to mayo classification                                | 296                         | Retrospective study              | 2019           | 21        |
| Pakistan  | Clinical presentation                                                                    | 56                          | Cross-sectional                  | 2008           | 22        |

|        |                                                                                                  |      |                            |       |    |  |
|--------|--------------------------------------------------------------------------------------------------|------|----------------------------|-------|----|--|
|        |                                                                                                  |      |                            | study |    |  |
| South  | Clinical characteristics                                                                         | 461  | Cross-sectional            | 2015  | 23 |  |
| Korea  |                                                                                                  |      | study                      |       |    |  |
| South  | Clinical characteristics                                                                         | 364  | Prospective                | 2018  | 24 |  |
| Korea  |                                                                                                  |      | cohort study               |       |    |  |
| Taipei | Incidence of cardiovascular complications<br>in ADPKD patients compared to general<br>population | 2062 | National<br>database study | 2017  | 25 |  |
| Turkey | Clinical characteristics                                                                         | 1139 | Cross-sectional<br>study   | 2011  | 26 |  |
| Turkey | Clinical characteristics and predictor of<br>renal progression                                   | 323  | Retrospective<br>study     | 2013  | 27 |  |



Figure 1. The planned structure and the data collections in RAPID-ADPKD study

90x41mm (300 x 300 DPI)

STROBE Statement—Checklist of items that should be included in reports of *cross-sectional studies*

|                              | Item No | Recommendation                                                                                                                                                                                    | Check list             |
|------------------------------|---------|---------------------------------------------------------------------------------------------------------------------------------------------------------------------------------------------------|------------------------|
| <b>Title and abstract</b>    | 1       | (a) Indicate the study's design with a commonly used term in the title or the abstract                                                                                                            | √<br>Page 1, 5         |
|                              |         | (b) Provide in the abstract an informative and balanced summary of what was done and what was found                                                                                               | √<br>Page 5            |
| <b>Introduction</b>          |         |                                                                                                                                                                                                   |                        |
| Background/rationale         | 2       | Explain the scientific background and rationale for the investigation being reported                                                                                                              | √<br>Page 8-9          |
| Objectives                   | 3       | State specific objectives, including any prespecified hypotheses                                                                                                                                  | √<br>Page 9            |
| <b>Methods</b>               |         |                                                                                                                                                                                                   |                        |
| Study design                 | 4       | Present key elements of study design early in the paper                                                                                                                                           | √<br>Page 9            |
| Setting                      | 5       | Describe the setting, locations, and relevant dates, including periods of recruitment, exposure, follow-up, and data collection                                                                   | √<br>Page 10, Figure 1 |
| Participants                 | 6       | (a) Give the eligibility criteria, and the sources and methods of selection of participants                                                                                                       | √<br>Page 10           |
| Variables                    | 7       | Clearly define all outcomes, exposures, predictors, potential confounders, and effect modifiers. Give diagnostic criteria, if applicable                                                          | √<br>Page 11           |
| Data sources/<br>measurement | 8*      | For each variable of interest, give sources of data and details of methods of assessment (measurement). Describe comparability of assessment methods if there is more than one group              | √<br>Page 11-13        |
| Bias                         | 9       | Describe any efforts to address potential sources of bias                                                                                                                                         | √<br>Page 11-13        |
| Study size                   | 10      | Explain how the study size was arrived at                                                                                                                                                         | √<br>Page 14           |
| Quantitative variables       | 11      | Explain how quantitative variables were handled in the analyses. If applicable, describe which groupings were chosen and why                                                                      | √<br>Page 15           |
| Statistical methods          | 12      | (a) Describe all statistical methods, including those used to control for confounding                                                                                                             | √<br>Page 15           |
|                              |         | (b) Describe any methods used to examine subgroups and interactions                                                                                                                               | √<br>Page 15           |
|                              |         | (c) Explain how missing data were addressed                                                                                                                                                       | √<br>Page 15           |
|                              |         | (d) If applicable, describe analytical methods taking account of sampling strategy                                                                                                                | √<br>Page 15           |
|                              |         | (e) Describe any sensitivity analyses                                                                                                                                                             | √<br><b>Page 14</b>    |
| <b>Results</b>               |         |                                                                                                                                                                                                   |                        |
| Participants                 | 13*     | (a) Report numbers of individuals at each stage of study—eg numbers potentially eligible, examined for eligibility, confirmed eligible, included in the study, completing follow-up, and analysed | NA                     |

|                          |     |                                                                                                                                                                                                              |                 |
|--------------------------|-----|--------------------------------------------------------------------------------------------------------------------------------------------------------------------------------------------------------------|-----------------|
|                          |     | (b) Give reasons for non-participation at each stage                                                                                                                                                         | NA              |
|                          |     | (c) Consider use of a flow diagram                                                                                                                                                                           | NA              |
| Descriptive data         | 14* | (a) Give characteristics of study participants (eg demographic, clinical, social) and information on exposures and potential confounders                                                                     | NA              |
|                          |     | (b) Indicate number of participants with missing data for each variable of interest                                                                                                                          | NA              |
| Outcome data             | 15* | Report numbers of outcome events or summary measures                                                                                                                                                         | NA              |
| Main results             | 16  | (a) Give unadjusted estimates and, if applicable, confounder-adjusted estimates and their precision (eg, 95% confidence interval). Make clear which confounders were adjusted for and why they were included | NA              |
|                          |     | (b) Report category boundaries when continuous variables were categorized                                                                                                                                    | NA              |
|                          |     | (c) If relevant, consider translating estimates of relative risk into absolute risk for a meaningful time period                                                                                             | NA              |
| Other analyses           | 17  | Report other analyses done—eg analyses of subgroups and interactions, and sensitivity analyses                                                                                                               | √<br>Page 15-16 |
| <b>Discussion</b>        |     |                                                                                                                                                                                                              |                 |
| Key results              | 18  | Summarise key results with reference to study objectives                                                                                                                                                     | √<br>Page 15-16 |
| Limitations              | 19  | Discuss limitations of the study, taking into account sources of potential bias or imprecision. Discuss both direction and magnitude of any potential bias                                                   | √<br>Page 18    |
| Interpretation           | 20  | Give a cautious overall interpretation of results considering objectives, limitations, multiplicity of analyses, results from similar studies, and other relevant evidence                                   | NA              |
| Generalisability         | 21  | Discuss the generalisability (external validity) of the study results                                                                                                                                        | √<br>Page 15    |
| <b>Other information</b> |     |                                                                                                                                                                                                              |                 |
| Funding                  | 22  | Give the source of funding and the role of the funders for the present study and, if applicable, for the original study on which the present article is based                                                | √<br>Page 26    |

\*Give information separately for exposed and unexposed groups.

**Note:** An Explanation and Elaboration article discusses each checklist item and gives methodological background and published examples of transparent reporting. The STROBE checklist is best used in conjunction with this article (freely available on the Web sites of PLoS Medicine at <http://www.plosmedicine.org/>, Annals of Internal Medicine at <http://www.annals.org/>, and Epidemiology at <http://www.epidem.com/>). Information on the STROBE Initiative is available at [www.strobe-statement.org](http://www.strobe-statement.org).
